# Supplementary material
Source: Royal Society of Chemistry journal article supplement (doi:10.1039/d5fo05398f)
Supplement: d5fo05398f1.pdf [file d5fo05398f1.pdf]

### Supplementary Material 1

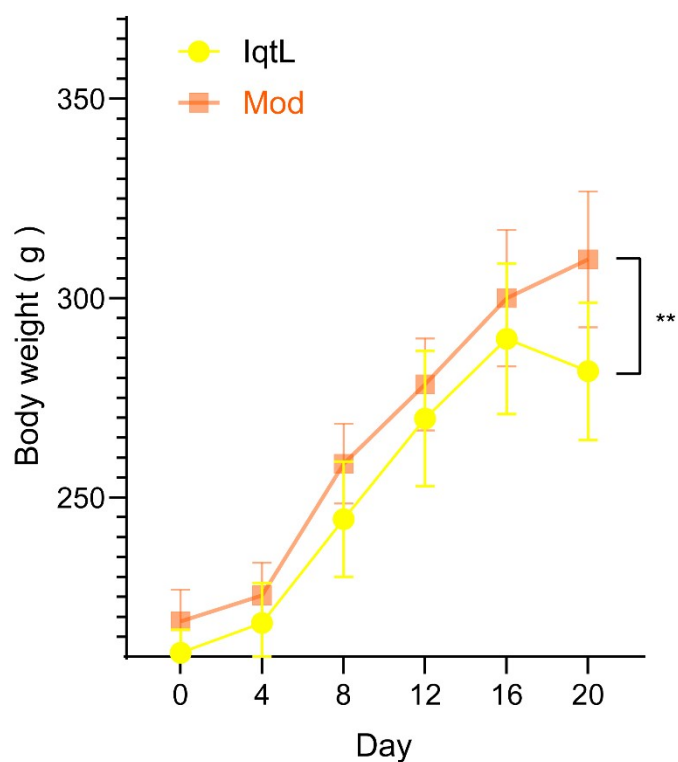

Fig. S1. Weight gain differences between the Mod group and the IqtL group.  $**P < 0.01$ .

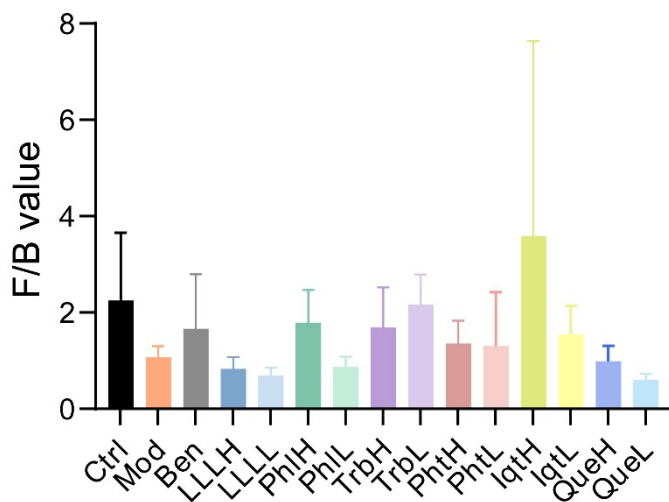

Fig. S2. The abundance ratio of the Firmicutes/ Bacteroidetes (F/B).
