# Supplementary material
Source: Royal Society of Chemistry journal article supplement (doi:10.1039/d5fo05398f)
Supplement: d5fo05398f2.xlsx [file d5fo05398f2.xlsx]

## Sheet: Sheet1
Table S1. Associated targets of the five major flavonoid active components in LLL
Constituent	Target	Common name
Phlorizin	Low affinity sodium-glucose cotransporter	SLC5A4
Phlorizin	Sodium/glucose cotransporter 2	SLC5A2
Phlorizin	Sodium/glucose cotransporter 1	SLC5A1
Phlorizin	Solute carrier family 28 member 3	SLC28A3
Phlorizin	Epoxide hydratase	EPHX2
Phlorizin	Tyrosinase	TYR
Phlorizin	Cytochrome P450 19A1	CYP19A1
Phlorizin	Steroid 5-alpha-reductase 1	SRD5A1
Phlorizin	Transforming protein p21/H-Ras-1	HRAS
Phlorizin	Adenosine A2a receptor (by homology)	ADORA2A
Phlorizin	Adenosine A2b receptor	ADORA2B
Phlorizin	Matrix metalloproteinase 1	MMP1
Phlorizin	Matrix metalloproteinase 7	MMP7
Phlorizin	Matrix metalloproteinase 8	MMP8
Phlorizin	Aldose reductase	AKR1B1
Phlorizin	Matrix metalloproteinase 3	MMP3
Phlorizin	Matrix metalloproteinase 9	MMP9
Phlorizin	ADAM17	ADAM17
Phlorizin	Serine/threonine-protein kinase Chk1	CHEK1
Phlorizin	Equilibrative nucleoside transporter 1	SLC29A1
Phlorizin	Estrogen receptor alpha	ESR1
Phlorizin	Inosine-5'-monophosphate dehydrogenase 1	IMPDH1
Phlorizin	Carbonic anhydrase XIV	CA14
Phlorizin	Cyclooxygenase-1	PTGS1
Phlorizin	Purine nucleoside phosphorylase	PNP
Phlorizin	Beta-glucocerebrosidase	GBA
Phlorizin	Sodium/nucleoside cotransporter 2	SLC28A2
Phlorizin	Galectin-3	LGALS3
Phlorizin	Galectin-9	LGALS9
Phlorizin	Adenosine kinase	ADK
Phlorizin	Estrogen receptor alpha	ESR1
Phloretin	Estrogen receptor beta	ESR2
Phloretin	Arachidonate 5-lipoxygenase	ALOX5
Phloretin	Acetylcholinesterase	ACHE
Phloretin	Tyrosinase	TYR
Phloretin	Phospholipase A2 group V	PLA2G5
Phloretin	NADPH oxidase 4	NOX4
Phloretin	Estradiol 17-beta-dehydrogenase 2	HSD17B2
Phloretin	Estradiol 17-beta-dehydrogenase 3	HSD17B3
Phloretin	Testis-specific androgen-binding protein	SHBG
Phloretin	17-beta-hydroxysteroid dehydrogenase 14	HSD17B14
Phloretin	Cyclin-dependent kinase 4	CDK4
Phloretin	Phospholipase A2 group IIA	PLA2G2A
Phloretin	14-3-3 protein gamma	YWHAG
Phloretin	Carbonic anhydrase VI	CA6
Phloretin	Carbonic anhydrase VB	CA5B
Phloretin	Carbonic anhydrase VA	CA5A
Phloretin	Alpha-synuclein	SNCA
Phloretin	Telomerase reverse transcriptase	TERT
Phloretin	Serine/threonine-protein kinase WEE1	WEE1
Phloretin	Quinone reductase 2	NQO2
Phloretin	MAP kinase p38 alpha	MAPK14
Phloretin	6-phosphogluconate dehydrogenase	PGD
Phloretin	Heat shock protein HSP 90-alpha	HSP90AA1
Phloretin	Insulin receptor	INSR
Phloretin	Cyclin-dependent kinase 5/CDK5 activator 1	CDK5R1 CDK5
Phloretin	Secreted frizzled-related protein 1	SFRP1
Phloretin	Beta amyloid A4 protein	APP
Phloretin	Cyclooxygenase-2	PTGS2
Phloretin	Insulin-like growth factor binding protein 3	IGFBP3
Phloretin	Cyclin-dependent kinase 1	CDK1
Phloretin	Estradiol 17-beta-dehydrogenase 1	HSD17B1
Phloretin	Histone deacetylase 3	HDAC3
Phloretin	Histone deacetylase 6	HDAC6
Phloretin	C-C chemokine receptor type 5	CCR5
Phloretin	Cyclin-dependent kinase 2	CDK2
Phloretin	Cyclooxygenase-1	PTGS1
Phloretin	Interferon-induced, double-stranded RNA-activated protein kinase	EIF2AK2
Phloretin	Receptor protein-tyrosine kinase erbB-2	ERBB2
Phloretin	Tissue-type plasminogen activator	PLAT
Phloretin	Cyclin-dependent kinase 2/cyclin E	CCNE2 CDK2 CCNE1
Phloretin	Urokinase-type plasminogen activator	PLAU
Phloretin	Monoamine oxidase A	MAOA
Phloretin	Serine/threonine-protein kinase Chk1	CHEK1
Phloretin	Pyruvate dehydrogenase kinase isoform 1	PDK1
Phloretin	Monoamine oxidase B	MAOB
Quercetin	NADPH oxidase 4	NOX4
Quercetin	Vasopressin V2 receptor	AVPR2
Quercetin	Aldose reductase	AKR1B1
Quercetin	Xanthine dehydrogenase	XDH
Quercetin	Monoamine oxidase A	MAOA
Quercetin	Insulin-like growth factor I receptor	IGF1R
Quercetin	Tyrosine-protein kinase receptor FLT3	FLT3
Quercetin	Cytochrome P450 19A1	CYP19A1
Quercetin	Epidermal growth factor receptor erbB1	EGFR
Quercetin	Thrombin	F2
Quercetin	Carbonic anhydrase II	CA2
Quercetin	Serine/threonine-protein kinase PIM1	PIM1
Quercetin	Arachidonate 5-lipoxygenase	ALOX5
Quercetin	Serine/threonine-protein kinase Aurora-B	AURKB
Quercetin	Dopamine D4 receptor	DRD4
Quercetin	Adenosine A1 receptor (by homology)	ADORA1
Quercetin	Carbonic anhydrase VII	CA7
Quercetin	Glyoxalase I	GLO1
Quercetin	Myeloperoxidase	MPO
Quercetin	PI3-kinase p85-alpha subunit	PIK3R1
Quercetin	Adenosine A2a receptor (by homology)	ADORA2A
Quercetin	Death-associated protein kinase 1	DAPK1
Quercetin	Liver glycogen phosphorylase	PYGL
Quercetin	Carbonic anhydrase I	CA1
Quercetin	Glycogen synthase kinase-3 beta	GSK3B
Quercetin	Tyrosine-protein kinase SRC	SRC
Quercetin	Focal adhesion kinase 1	PTK2
Quercetin	Estradiol 17-beta-dehydrogenase 2	HSD17B2
Quercetin	Vascular endothelial growth factor receptor 2	KDR
Quercetin	Matrix metalloproteinase 13	MMP13
Quercetin	Matrix metalloproteinase 3	MMP3
Quercetin	Carbonic anhydrase III	CA3
Quercetin	Arachidonate 15-lipoxygenase	ALOX15
Quercetin	Multidrug resistance-associated protein 1	ABCC1
Quercetin	Serine/threonine-protein kinase PLK1	PLK1
Quercetin	Carbonic anhydrase VI	CA6
Quercetin	Cyclin-dependent kinase 1	CDK1
Quercetin	Matrix metalloproteinase 9	MMP9
Quercetin	Carbonic anhydrase XII	CA12
Quercetin	Matrix metalloproteinase 2	MMP2
Quercetin	Protein kinase N1	PKN1
Quercetin	Carbonic anhydrase XIV	CA14
Quercetin	Carbonic anhydrase IX	CA9
Quercetin	Casein kinase II alpha	CSNK2A1
Quercetin	Arachidonate 12-lipoxygenase	ALOX12
Quercetin	Hepatocyte growth factor receptor	MET
Quercetin	Carbonic anhydrase IV	CA4
Quercetin	Serine/threonine-protein kinase NEK2	NEK2
Quercetin	Interleukin-8 receptor A	CXCR1
Quercetin	CaM kinase II beta	CAMK2B
Quercetin	ALK tyrosine kinase receptor	ALK
Quercetin	Serine/threonine-protein kinase AKT	AKT1
Quercetin	P-glycoprotein 1	ABCB1
Quercetin	Serine/threonine-protein kinase NEK6	NEK6
Quercetin	Phospholipase A2 group 1B	PLA2G1B
Quercetin	Carbonic anhydrase VA	CA5A
Quercetin	Beta-secretase 1	BACE1
Quercetin	Cytochrome P450 1B1	CYP1B1
Quercetin	Tyrosine-protein kinase receptor UFO	AXL
Quercetin	ATP-binding cassette sub-family G member 2	ABCG2
Quercetin	NUAK family SNF1-like kinase 1	NUAK1
Quercetin	Aldo-keto reductase family 1 member C2 (by homology)	AKR1C2
Quercetin	Aldo-keto reductase family 1 member C1 (by homology)	AKR1C1
Quercetin	Aldo-keto-reductase family 1 member C3 (by homology)	AKR1C3
Quercetin	Aldo-keto reductase family 1 member C4 (by homology)	AKR1C4
Quercetin	Carbonic anhydrase XIII (by homology)	CA13
Quercetin	Aldehyde reductase (by homology)	AKR1A1
Quercetin	G-protein coupled receptor 35	GPR35
Quercetin	Microtubule-associated protein tau	MAPT
Quercetin	Lysine-specific demethylase 4D-like	KDM4E
Quercetin	DNA topoisomerase II alpha	TOP2A
Quercetin	Insulin receptor	INSR
Quercetin	Acetylcholinesterase	ACHE
Quercetin	Myosin light chain kinase, smooth muscle	MYLK
Quercetin	Tyrosine-protein kinase SYK	SYK
Quercetin	PI3-kinase p110-gamma subunit	PIK3CG
Quercetin	DNA-(apurinic or apyrimidinic site) lyase	APEX1
Quercetin	Receptor-type tyrosine-protein phosphatase S	PTPRS
Quercetin	Estrogen receptor beta	ESR2
Quercetin	DNA-3-methyladenine glycosylase	MPG
Quercetin	Solute carrier family 22 member 12	SLC22A12
Quercetin	Cyclin-dependent kinase 5/CDK5 activator 1	CDK5R1 CDK5
Quercetin	Cyclin-dependent kinase 1/cyclin B	CCNB3 CDK1 CCNB1 CCNB2
Quercetin	Arginase-1 (by homology)	ARG1
Quercetin	Cyclin-dependent kinase 6	CDK6
Quercetin	Cyclin-dependent kinase 2	CDK2
Quercetin	Tyrosinase	TYR
Quercetin	Estradiol 17-beta-dehydrogenase 1	HSD17B1
Quercetin	Aryl hydrocarbon receptor	AHR
Quercetin	Estrogen-related receptor alpha	ESRRA
Quercetin	Beta amyloid A4 protein	APP
Quercetin	Poly [ADP-ribose] polymerase-1	PARP1
Quercetin	Transthyretin	TTR
Quercetin	Matrix metalloproteinase 12	MMP12
Quercetin	Lymphocyte differentiation antigen CD38	CD38
Quercetin	Aldo-keto reductase family 1 member B10	AKR1B10
Quercetin	Tankyrase-2	TNKS2
Quercetin	Tankyrase-1	TNKS
Quercetin	DNA topoisomerase I (by homology)	TOP1
Quercetin	Telomerase reverse transcriptase	TERT
Trilobatin	Sodium/glucose cotransporter 1	SLC5A1
Trilobatin	Sodium/glucose cotransporter 2	SLC5A2
Trilobatin	Tyrosinase	TYR
Trilobatin	Low affinity sodium-glucose cotransporter	SLC5A4
Trilobatin	Steroid 5-alpha-reductase 1	SRD5A1
Trilobatin	Cytochrome P450 19A1	CYP19A1
Trilobatin	Epoxide hydratase	EPHX2
Trilobatin	Solute carrier family 28 member 3	SLC28A3
Trilobatin	Protein-tyrosine phosphatase 1B	PTPN1
Trilobatin	Aldose reductase	AKR1B1
Trilobatin	Estrogen receptor alpha	ESR1
Trilobatin	T-cell protein-tyrosine phosphatase	PTPN2
Trilobatin	Adenosine A2a receptor (by homology)	ADORA2A
Trilobatin	Metabotropic glutamate receptor 2 (by homology)	GRM2
Trilobatin	Matrix metalloproteinase 1	MMP1
Trilobatin	Matrix metalloproteinase 7	MMP7
Trilobatin	Matrix metalloproteinase 8	MMP8
Trilobatin	DNA topoisomerase I	TOP1
Trilobatin	Transforming protein p21/H-Ras-1	HRAS
Trilobatin	Adenosine A2b receptor	ADORA2B
ISOQUERCITRIN	Aldose reductase	AKR1B1
ISOQUERCITRIN	Carbonic anhydrase II	CA2
ISOQUERCITRIN	Carbonic anhydrase VII	CA7
ISOQUERCITRIN	Carbonic anhydrase XII	CA12
ISOQUERCITRIN	Carbonic anhydrase IV	CA4
ISOQUERCITRIN	NADPH oxidase 4	NOX4
ISOQUERCITRIN	Adrenergic receptor alpha-2	ADRA2C
ISOQUERCITRIN	Acetylcholinesterase	ACHE
ISOQUERCITRIN	Quinone reductase 2	NQO2
ISOQUERCITRIN	Ribosomal protein S6 kinase alpha 3	RPS6KA3
ISOQUERCITRIN	Neuromedin-U receptor 2	NMUR2
ISOQUERCITRIN	Alpha-2a adrenergic receptor	ADRA2A
ISOQUERCITRIN	Cyclooxygenase-2	PTGS2
ISOQUERCITRIN	Lymphocyte differentiation antigen CD38	CD38
ISOQUERCITRIN	Phosphodiesterase 5A	PDE5A
ISOQUERCITRIN	TNF-alpha	TNF
ISOQUERCITRIN	Interleukin-2	IL2
ISOQUERCITRIN	Xanthine dehydrogenase	XDH
ISOQUERCITRIN	Adenosine A1 receptor (by homology)	ADORA1
ISOQUERCITRIN	Arachidonate 5-lipoxygenase	ALOX5
ISOQUERCITRIN	Equilibrative nucleoside transporter 1	SLC29A1
ISOQUERCITRIN	Telomerase reverse transcriptase	TERT
