# Supplementary material
Source: Royal Society of Chemistry journal article supplement (doi:10.1039/d5fo05398f)
Supplement: d5fo05398f3.xlsx [file d5fo05398f3.xlsx]

## Sheet: Table S2
Table S2. Associated targets of hyperuricemia
Gene Symbol	Description	Category	Uniprot ID	Gifts	GC Id	Relevance score
HPRT1	Hypoxanthine Phosphoribosyltransferase 1	Protein Coding	P00492	55	GC0XP134460	54.8281
SARS2	Seryl-TRNA Synthetase 2, Mitochondrial	Protein Coding	Q9NP81	52	GC19M079542	47.706
UMOD	Uromodulin	Protein Coding	P07911	49	GC16M020344	37.1302
LOC107032760	Origin Of Replication In Promoter/Intron 1 Of HPRT1	Functional Element		4	GC0XP134461	26.5195
REN	Renin	Protein Coding	P00797	56	GC01M204154	19.2163
ABCG2	ATP Binding Cassette Subfamily G Member 2 (Junior Blood Group)	Protein Coding	Q9UNQ0	56	GC04M088090	18.9266
SLC22A12	Solute Carrier Family 22 Member 12	Protein Coding	Q96S37	51	GC11P064679	17.3706
PRPS1	Phosphoribosyl Pyrophosphate Synthetase 1	Protein Coding	P60891	54	GC0XP107628	17.3162
G6PC1	Glucose-6-Phosphatase Catalytic Subunit 1	Protein Coding	P35575	51	GC17P079560	17.0484
HNF1B	HNF1 Homeobox B	Protein Coding	P35680	50	GC17M037686	16.1651
SLC37A4	Solute Carrier Family 37 Member 4	Protein Coding	O43826	49	GC11M119394	16.0357
SLC2A9	Solute Carrier Family 2 Member 9	Protein Coding	Q9NRM0	52	GC04M009772	14.0747
MUC1	Mucin 1, Cell Surface Associated	Protein Coding	P15941	55	GC01M155185	13.8311
LOC107548112	REN Promoter And Enhancer Region	Functional Element		4	GC01P204162	13.4003
PFKM	Phosphofructokinase, Muscle	Protein Coding	P08237	56	GC12P048105	11.4209
XDH	Xanthine Dehydrogenase	Protein Coding	P47989	54	GC02M031334	11.245
SEC61A1	SEC61 Translocon Subunit Alpha 1	Protein Coding	P61619	49	GC03P128051	11.0451
ANO5	Anoctamin 5	Protein Coding	Q75V66	47	GC11P021799	9.65199
GAA	Alpha Glucosidase	Protein Coding	P10253	56	GC17P080101	9.14036
INS	Insulin	Protein Coding	P01308	54	GC11M002159	9.00793
SLC17A1	Solute Carrier Family 17 Member 1	Protein Coding	Q14916	45	GC06M025723	8.74052
SLC17A3	Solute Carrier Family 17 Member 3	Protein Coding	O00476	46	GC06M025833	8.17152
SARS1	Seryl-TRNA Synthetase 1	Protein Coding	P49591	50	GC01P109238	8.01698
PPARG	Peroxisome Proliferator Activated Receptor Gamma	Protein Coding	P37231	60	GC03P012287	7.6097
HNFJ3	Hyperuricemic Nephropathy, Familial Juvenile, 3	Genetic Locus		2	GC02U902459	7.55738
MTHFR	Methylenetetrahydrofolate Reductase	Protein Coding	P42898	54	GC01M011785	7.43851
ADRB3	Adrenoceptor Beta 3	Protein Coding	P13945	50	GC08M037962	7.38144
GPATCH8	G-Patch Domain Containing 8	Protein Coding	Q9UKJ3	42	GC17M044395	7.32071
CRP	C-Reactive Protein	Protein Coding	P02741	52	GC01M159732	6.48768
APRT	Adenine Phosphoribosyltransferase	Protein Coding	P07741	53	GC16M088810	6.28839
GPT	Glutamic--Pyruvic Transaminase	Protein Coding	P24298	48	GC08P144502	6.04901
ADA	Adenosine Deaminase	Protein Coding	P00813	58	GC20M044620	5.93864
PPAT	Phosphoribosyl Pyrophosphate Amidotransferase	Protein Coding	Q06203	49	GC04M056393	5.91595
PRPS1L1	Phosphoribosyl Pyrophosphate Synthetase 1 Like 1	Protein Coding	P21108	44	GC07M018026	5.67116
ALDH16A1	Aldehyde Dehydrogenase 16 Family Member A1	Protein Coding	Q8IZ83	42	GC19P049453	5.6599
PNP	Purine Nucleoside Phosphorylase	Protein Coding	P00491	56	GC14P038215	5.65087
APOE	Apolipoprotein E	Protein Coding	P02649	57	GC19P083472	5.63498
NLRP3	NLR Family Pyrin Domain Containing 3	Protein Coding	Q96P20	55	GC01P247415	5.40302
LEP	Leptin	Protein Coding	P41159	53	GC07P128241	5.27789
ALB	Albumin	Protein Coding	P02768	56	GC04P073397	5.22613
PHKA2	Phosphorylase Kinase Regulatory Subunit Alpha 2	Protein Coding	P46019	52	GC0XM018892	5.1377
LCN2	Lipocalin 2	Protein Coding	P80188	52	GC09P128149	5.07482
HAVCR1	Hepatitis A Virus Cellular Receptor 1	Protein Coding	Q96D42	49	GC05M157028	5.07482
GDA	Guanine Deaminase	Protein Coding	Q9Y2T3	51	GC09P072114	5.0402
FBP1	Fructose-Bisphosphatase 1	Protein Coding	P09467	56	GC09M094603	4.95066
PAX2	Paired Box 2	Protein Coding	Q02962	53	GC10P100735	4.94723
SLC22A6	Solute Carrier Family 22 Member 6	Protein Coding	Q4U2R8	51	GC11M109117	4.92777
SLC22A8	Solute Carrier Family 22 Member 8	Protein Coding	Q8TCC7	49	GC11M109118	4.92777
CXCL8	C-X-C Motif Chemokine Ligand 8	Protein Coding	P10145	50	GC04P073740	4.77249
PHKB	Phosphorylase Kinase Regulatory Subunit Beta	Protein Coding	Q93100	50	GC16P049403	4.70587
ABCC4	ATP Binding Cassette Subfamily C Member 4	Protein Coding	O15439	52	GC13M095019	4.67625
ERCC6	ERCC Excision Repair 6, Chromatin Remodeling Factor	Protein Coding	Q03468	53	GC10M049454	4.66004
PYGL	Glycogen Phosphorylase L	Protein Coding	P06737	53	GC14M050857	4.5404
APOB	Apolipoprotein B	Protein Coding	P04114	53	GC02M020956	4.48401
SLC22A11	Solute Carrier Family 22 Member 11	Protein Coding	Q9NSA0	47	GC11P064604	4.46452
SERPINE1	Serpin Family E Member 1	Protein Coding	P05121	57	GC07P101127	4.44315
PTH	Parathyroid Hormone	Protein Coding	P01270	52	GC11M013492	4.44315
PYGM	Glycogen Phosphorylase, Muscle Associated	Protein Coding	P11217	53	GC11M064746	4.30913
SLC28A2	Solute Carrier Family 28 Member 2	Protein Coding	O43868	48	GC15P045252	4.27006
SLC12A1	Solute Carrier Family 12 Member 1	Protein Coding	Q13621	54	GC15P054001	4.21697
NIPSNAP2	Nipsnap Homolog 2	Protein Coding	O75323	45	GC07P059653	4.15919
SPG21	SPG21 Abhydrolase Domain Containing, Maspardin	Protein Coding	Q9NZD8	45	GC15M064963	4.15919
PAAF1	Proteasomal ATPase Associated Factor 1	Protein Coding	Q9BRP4	40	GC11P073876	4.15919
MIR143	MicroRNA 143	RNA Gene		26	GC05P149417	4.08339
DARS2	Aspartyl-TRNA Synthetase 2, Mitochondrial	Protein Coding	Q6PI48	49	GC01P173824	4.02463
CFTR	CF Transmembrane Conductance Regulator	Protein Coding	P13569	58	GC07P117287	3.97218
SLC4A4	Solute Carrier Family 4 Member 4	Protein Coding	Q9Y6R1	54	GC04P071063	3.97218
PDZK1	PDZ Domain Containing 1	Protein Coding	Q5T2W1	46	GC01M145670	3.96544
TMEM171	Transmembrane Protein 171	Protein Coding	Q8WVE6	37	GC05P073120	3.9422
MIR155	MicroRNA 155	RNA Gene		24	GC21P025573	3.85029
LDHD	Lactate Dehydrogenase D	Protein Coding	Q86WU2	47	GC16M075111	3.39312
HMGCL	3-Hydroxy-3-Methylglutaryl-CoA Lyase	Protein Coding	P35914	52	GC01M023801	3.39019
ALDOB	Aldolase, Fructose-Bisphosphate B	Protein Coding	P05062	52	GC09M101420	3.28484
MSMB	Microseminoprotein Beta	Protein Coding	P08118	46	GC10M046033	3.24905
LPL	Lipoprotein Lipase	Protein Coding	P06858	56	GC08P019901	3.24583
PKD2	Polycystin 2, Transient Receptor Potential Cation Channel	Protein Coding	Q13563	55	GC04P088007	3.14205
CLDN16	Claudin 16	Protein Coding	Q9Y5I7	48	GC03P190290	3.11174
R3HDM2	R3H Domain Containing 2	Protein Coding	Q9Y2K5	44	GC12M057253	3.11087
B3GNT4	UDP-GlcNAc:BetaGal Beta-1,3-N-Acetylglucosaminyltransferase 4	Protein Coding	Q9C0J1	40	GC12P122203	3.11087
MYC	MYC Proto-Oncogene, BHLH Transcription Factor	Protein Coding	P01106	59	GC08P127735	2.93865
ACAT1	Acetyl-CoA Acetyltransferase 1	Protein Coding	P24752	56	GC11P108121	2.93865
TNFRSF11A	TNF Receptor Superfamily Member 11a	Protein Coding	Q9Y6Q6	54	GC18P062325	2.93865
TNFRSF11B	TNF Receptor Superfamily Member 11b	Protein Coding	O00300	54	GC08M118923	2.93865
LMAN1	Lectin, Mannose Binding 1	Protein Coding	P49257	52	GC18M059327	2.93865
MCFD2	Multiple Coagulation Factor Deficiency 2, ER Cargo Receptor Complex Subunit	Protein Coding	Q8NI22	50	GC02M046901	2.93865
SH2B1	SH2B Adaptor Protein 1	Protein Coding	Q9NRF2	49	GC16P046952	2.93865
ALMS1	ALMS1 Centrosome And Basal Body Associated Protein	Protein Coding	Q8TCU4	48	GC02P073385	2.93865
ADSL	Adenylosuccinate Lyase	Protein Coding	P30566	54	GC22P040346	2.93855
AMPD1	Adenosine Monophosphate Deaminase 1	Protein Coding	P23109	52	GC01M114673	2.909
P2RX7	Purinergic Receptor P2X 7	Protein Coding	Q99572	53	GC12P128227	2.80464
MAOA	Monoamine Oxidase A	Protein Coding	P21397	56	GC0XP043654	2.75872
NPHP1	Nephrocystin 1	Protein Coding	O15259	50	GC02M110122	2.73241
LOC126862549	BRD4-Independent Group 4 Enhancer GRCh37_chr17:36093401-36094600	Functional Element		4	GC17P080691	2.6715
TNF	Tumor Necrosis Factor	Protein Coding	P01375	58	GC06P104098	2.60755
MIRLET7C	MicroRNA Let-7c	RNA Gene		25	GC21P016559	2.57011
PHKA2-AS1	PHKA2 Antisense RNA 1	RNA Gene		17	GC0XP018845	2.57011
TYMS	Thymidylate Synthetase	Protein Coding	P04818	57	GC18P000657	2.56101
GGT1	Gamma-Glutamyltransferase 1	Protein Coding	P19440	56	GC22P024583	2.54927
AGL	Amylo-Alpha-1, 6-Glucosidase, 4-Alpha-Glucanotransferase	Protein Coding	P35573	53	GC01P099850	2.54731
NEAT1	Nuclear Paraspeckle Assembly Transcript 1	RNA Gene		28	GC11P072900	2.49841
HTR2A	5-Hydroxytryptamine Receptor 2A	Protein Coding	P28223	54	GC13M046831	2.49327
LOC126805821	CDK7 Strongly-Dependent Group 2 Enhancer GRCh37_chr1:109779623-109780822	Functional Element		2	GC01P109239	2.48897
GBE1	1,4-Alpha-Glucan Branching Enzyme 1	Protein Coding	Q04446	50	GC03M081489	2.45094
AMPD3	Adenosine Monophosphate Deaminase 3	Protein Coding	Q01432	50	GC11P010309	2.41791
NPHP4	Nephrocystin 4	Protein Coding	O75161	47	GC01M010009	2.38622
NPHP3	Nephrocystin 3	Protein Coding	Q7Z494	46	GC03M132683	2.38622
SHROOM3	Shroom Family Member 3	Protein Coding	Q8TF72	44	GC04P076435	2.38622
AFG2B	AFG2 AAA ATPase Homolog B	Protein Coding	Q9BVQ7	42	GC15P045402	2.38622
ACSM2B	Acyl-CoA Synthetase Medium Chain Family Member 2B	Protein Coding	Q68CK6	41	GC16M020547	2.38622
CST9	Cystatin 9	Protein Coding	Q5W186	38	GC20M023780	2.38622
NGF	Nerve Growth Factor	Protein Coding	P01138	58	GC01M115285	2.33473
ADK	Adenosine Kinase	Protein Coding	P55263	57	GC10P074370	2.33473
SLC6A3	Solute Carrier Family 6 Member 3	Protein Coding	Q01959	57	GC05M001392	2.33473
ATIC	5-Aminoimidazole-4-Carboxamide Ribonucleotide Formyltransferase/IMP Cyclohydrolase	Protein Coding	P31939	52	GC02P215311	2.33473
PANK2	Pantothenate Kinase 2	Protein Coding	Q9BZ23	52	GC20P004929	2.33473
DGUOK	Deoxyguanosine Kinase	Protein Coding	Q16854	50	GC02P073926	2.33473
SGCE	Sarcoglycan Epsilon	Protein Coding	O43556	49	GC07M094524	2.33473
EN1	Engrailed Homeobox 1	Protein Coding	Q05925	46	GC02M118842	2.33473
THAP1	THAP Domain Containing 1	Protein Coding	Q9NVV9	46	GC08M042836	2.33473
PRTFDC1	Phosphoribosyl Transferase Domain Containing 1	Protein Coding	Q9NRG1	40	GC10M024848	2.33473
PMS2	PMS1 Homolog 2, Mismatch Repair System Component	Protein Coding	P54278	56	GC07M005973	2.32531
SLC3A1	Solute Carrier Family 3 Member 1	Protein Coding	Q07837	54	GC02P044275	2.32531
ABCD1	ATP Binding Cassette Subfamily D Member 1	Protein Coding	P33897	53	GC0XP153724	2.32531
PTPN22	Protein Tyrosine Phosphatase Non-Receptor Type 22	Protein Coding	Q9Y2R2	53	GC01M113813	2.32531
ACAT2	Acetyl-CoA Acetyltransferase 2	Protein Coding	Q9BWD1	52	GC06P161321	2.32531
ERCC4	ERCC Excision Repair 4, Endonuclease Catalytic Subunit	Protein Coding	Q92889	52	GC16P013920	2.32531
SLC7A9	Solute Carrier Family 7 Member 9	Protein Coding	P82251	51	GC19M032830	2.32531
BSCL2	BSCL2 Lipid Droplet Biogenesis Associated, Seipin	Protein Coding	Q96G97	50	GC11M109101	2.32531
ERCC8	ERCC Excision Repair 8, CSA Ubiquitin Ligase Complex Subunit	Protein Coding	Q13216	50	GC05M060905	2.32531
CENPF	Centromere Protein F	Protein Coding	P49454	49	GC01P214603	2.32531
NDUFAF2	NADH:Ubiquinone Oxidoreductase Complex Assembly Factor 2	Protein Coding	Q8N183	48	GC05P060945	2.32531
PREPL	Prolyl Endopeptidase Like	Protein Coding	Q4J6C6	48	GC02M044316	2.32531
PVT1	Pvt1 Oncogene	RNA Gene		29	GC08P127908	2.32531
MIR145	MicroRNA 145	RNA Gene		26	GC05P149430	2.32531
MIR127	MicroRNA 127	RNA Gene		24	GC14P112022	2.32531
MIR34B	MicroRNA 34b	RNA Gene		24	GC11P112123	2.32531
HNRNPUL2-BSCL2	HNRNPUL2-BSCL2 Readthrough (NMD Candidate)	RNA Gene		18	GC11M109102	2.32531
AP4B1-AS1	AP4B1 Antisense RNA 1	RNA Gene		17	GC01P113816	2.32531
MINCR	MYC-Induced Long Non-Coding RNA	RNA Gene		17	GC08M143286	2.32531
ERCC8-AS1	ERCC8 Antisense RNA 1	RNA Gene		11	GC05P060915	2.32531
TP53COR1	Tumor Protein P53 Pathway Corepressor 1	RNA Gene		9	GC06U903133	2.32531
LOC114803475	PPARG EExon Liver Enhancer	Functional Element		4	GC03P012405	2.32531
LOC126806252	BRD4-Independent Group 4 Enhancer GRCh37_chr2:73828496-73829695	Functional Element		4	GC02P073601	2.32531
OBHP	Obesity And Hypopigmentation	Genetic Locus		1	GC20U903709	2.32531
IL6	Interleukin 6	Protein Coding	P05231	58	GC07P022725	2.27181
CACNA1S	Calcium Voltage-Gated Channel Subunit Alpha1 S	Protein Coding	Q13698	56	GC01M201008	2.26792
A1CF	APOBEC1 Complementation Factor	Protein Coding	Q9NQ94	44	GC10M050799	2.24802
PGAM2	Phosphoglycerate Mutase 2	Protein Coding	P15259	50	GC07M044062	2.22335
GYS1	Glycogen Synthase 1	Protein Coding	P13807	56	GC19M079858	2.21877
COL1A1	Collagen Type I Alpha 1 Chain	Protein Coding	P02452	56	GC17M061318	2.21444
HNF1A	HNF1 Homeobox A	Protein Coding	P20823	53	GC12P120978	2.19905
CARMIL1	Capping Protein Regulator And Myosin 1 Linker 1	Protein Coding	Q5VZK9	41	GC06P025402	2.19261
CERNA3	Competing Endogenous LncRNA 3 For MiR-645	RNA Gene		14	GC08P056088	2.19011
CXCL13	C-X-C Motif Chemokine Ligand 13	Protein Coding	O43927	47	GC04P077511	2.14962
GYG1	Glycogenin 1	Protein Coding	P46976	53	GC03P148991	2.09778
GYS2	Glycogen Synthase 2	Protein Coding	P54840	52	GC12M025066	2.09778
PHKA1	Phosphorylase Kinase Regulatory Subunit Alpha 1	Protein Coding	P46020	49	GC0XM072578	2.09778
LINC01672	Long Intergenic Non-Protein Coding RNA 1672	RNA Gene		14	GC01P007077	2.08587
ALDH2	Aldehyde Dehydrogenase 2 Family Member	Protein Coding	P05091	57	GC12P111766	2.00964
MIR142	MicroRNA 142	RNA Gene		24	GC17M058331	1.97653
MIR30C1	MicroRNA 30c-1	RNA Gene		24	GC01P040757	1.97653
MIR17	MicroRNA 17	RNA Gene		22	GC13P091350	1.97653
PC	Pyruvate Carboxylase	Protein Coding	P11498	54	GC11M066848	1.95426
PHKG2	Phosphorylase Kinase Catalytic Subunit Gamma 2	Protein Coding	P15735	53	GC16P047786	1.95426
PAGR1	PAXIP1 Associated Glutamate Rich Protein 1	Protein Coding	Q9BTK6	41	GC16P047698	1.95426
CD40LG	CD40 Ligand	Protein Coding	P29965	57	GC0XP136649	1.80343
IL6R	Interleukin 6 Receptor	Protein Coding	P08887	57	GC01P154405	1.80343
NPPA	Natriuretic Peptide A	Protein Coding	P01160	52	GC01M011846	1.79205
SLC2A2	Solute Carrier Family 2 Member 2	Protein Coding	P11168	56	GC03M170996	1.76722
FAH	Fumarylacetoacetate Hydrolase	Protein Coding	P16930	54	GC15P080152	1.76722
NCOA3	Nuclear Receptor Coactivator 3	Protein Coding	Q9Y6Q9	54	GC20P047501	1.76722
NCOA2	Nuclear Receptor Coactivator 2	Protein Coding	Q15596	52	GC08M070109	1.76722
MLXIPL	MLX Interacting Protein Like	Protein Coding	Q9NP71	50	GC07M073593	1.76722
NCOA1	Nuclear Receptor Coactivator 1	Protein Coding	Q15788	50	GC02P024492	1.76722
G6PC3	Glucose-6-Phosphatase Catalytic Subunit 3	Protein Coding	Q9BUM1	48	GC17P044070	1.76722
GCG	Glucagon	Protein Coding	P01275	48	GC02M162142	1.76722
NEK3	NIMA Related Kinase 3	Protein Coding	P51956	46	GC13M052132	1.76722
G6PC2	Glucose-6-Phosphatase Catalytic Subunit 2	Protein Coding	Q9NQR9	45	GC02P168901	1.76722
SLC37A1	Solute Carrier Family 37 Member 1	Protein Coding	P57057	45	GC21P042598	1.76722
SLC37A3	Solute Carrier Family 37 Member 3	Protein Coding	Q8NCC5	44	GC07M140293	1.76722
SEC63	SEC63 Homolog, Protein Translocation Regulator	Protein Coding	Q9UGP8	51	GC06M107867	1.75997
RBP4	Retinol Binding Protein 4	Protein Coding	P02753	52	GC10M093591	1.75657
LINC02605	Long Intergenic Non-Protein Coding RNA 2605	RNA Gene		14	GC08P078838	1.75657
SLC22A13	Solute Carrier Family 22 Member 13	Protein Coding	Q9Y226	46	GC03P038265	1.70849
MIR146A	MicroRNA 146a	RNA Gene		25	GC05P160485	1.68027
GDF15	Growth Differentiation Factor 15	Protein Coding	Q99988	49	GC19P082847	1.66838
HLA-B	Major Histocompatibility Complex, Class I, B	Protein Coding	P01889	53	GC06M080881	1.66498
PRPS2	Phosphoribosyl Pyrophosphate Synthetase 2	Protein Coding	P11908	49	GC0XP012791	1.62832
TRIM46	Tripartite Motif Containing 46	Protein Coding	Q7Z4K8	41	GC01P155173	1.62832
GNB3	G Protein Subunit Beta 3	Protein Coding	P16520	53	GC12P006839	1.61311
HNF4G	Hepatocyte Nuclear Factor 4 Gamma	Protein Coding	Q14541	49	GC08P075407	1.60279
SHLD2	Shieldin Complex Subunit 2	Protein Coding	Q86V20	34	GC10P098433	1.60279
PGR-AS1	PGR Antisense RNA 1	RNA Gene		13	GC11P101131	1.60279
ENO3	Enolase 3	Protein Coding	P13929	54	GC17P004948	1.60187
IL1B	Interleukin 1 Beta	Protein Coding	P01584	54	GC02M112829	1.59407
TMX2-CTNND1	TMX2-CTNND1 Readthrough (NMD Candidate)	RNA Gene		18	GC11P057712	1.57887
CAT	Catalase	Protein Coding	P04040	58	GC11P034460	1.56585
UCP2	Uncoupling Protein 2	Protein Coding	P55851	53	GC11M073974	1.56585
LPCAT3	Lysophosphatidylcholine Acyltransferase 3	Protein Coding	Q6P1A2	45	GC12M006976	1.56585
ZPBP2	Zona Pellucida Binding Protein 2	Protein Coding	Q6X784	42	GC17P077952	1.56585
MIR223	MicroRNA 223	RNA Gene		24	GC0XP066018	1.56585
SOD1	Superoxide Dismutase 1	Protein Coding	P00441	60	GC21P031659	1.52498
MCAM	Melanoma Cell Adhesion Molecule	Protein Coding	P43121	48	GC11M119308	1.52498
MIR126	MicroRNA 126	RNA Gene		25	GC09P136670	1.52498
MIR222	MicroRNA 222	RNA Gene		23	GC0XM045747	1.52498
MIR133A2	MicroRNA 133a-2	RNA Gene		22	GC20P063786	1.52498
MIR16-1	MicroRNA 16-1	RNA Gene		22	GC13M050048	1.52498
MIR25	MicroRNA 25	RNA Gene		22	GC07M100093	1.52498
MIR30A	MicroRNA 30a	RNA Gene		22	GC06M071403	1.52498
MIR30C2	MicroRNA 30c-2	RNA Gene		22	GC06M081465	1.52498
MIR16-2	MicroRNA 16-2	RNA Gene		21	GC03P160418	1.52498
MIR18A	MicroRNA 18a	RNA Gene		21	GC13P091622	1.52498
MIR133A1	MicroRNA 133a-1	RNA Gene		19	GC18M030227	1.52498
MIR488	MicroRNA 488	RNA Gene		19	GC01M177029	1.52498
MIR663A	MicroRNA 663a	RNA Gene		17	GC20M026208	1.52498
MIR920	MicroRNA 920	RNA Gene		16	GC12P024212	1.52498
LEPQTL1	Leptin, Serum Levels Of	Genetic Locus		4	GC02U903086	1.52498
SLC16A9	Solute Carrier Family 16 Member 9	Protein Coding	Q7RTY1	44	GC10M059650	1.50682
LRP2	LDL Receptor Related Protein 2	Protein Coding	P98164	55	GC02M169127	1.50605
FTH1	Ferritin Heavy Chain 1	Protein Coding	P02794	57	GC11M061959	1.4786
FASN	Fatty Acid Synthase	Protein Coding	P49327	56	GC17M082078	1.4786
FTL	Ferritin Light Chain	Protein Coding	P02792	52	GC19P048965	1.4786
LIPC	Lipase C, Hepatic Type	Protein Coding	P11150	52	GC15P058410	1.4786
CDC42BPG	CDC42 Binding Protein Kinase Gamma	Protein Coding	Q6DT37	44	GC11M064823	1.4786
IL10	Interleukin 10	Protein Coding	P22301	54	GC01M206767	1.47132
VEGFA	Vascular Endothelial Growth Factor A	Protein Coding	P15692	56	GC06P043770	1.45103
NPPB	Natriuretic Peptide B	Protein Coding	P16860	50	GC01M011858	1.4397
HFE	Homeostatic Iron Regulator	Protein Coding	Q30201	52	GC06P026087	1.42359
ANO6	Anoctamin 6	Protein Coding	Q4KMQ2	49	GC12P045215	1.42359
ADTRP	Androgen Dependent TFPI Regulating Protein	Protein Coding	Q96IZ2	37	GC06M011712	1.42359
TLR4	Toll Like Receptor 4	Protein Coding	O00206	58	GC09P117704	1.38011
SLC22A7	Solute Carrier Family 22 Member 7	Protein Coding	Q9Y694	49	GC06P104301	1.38011
TF	Transferrin	Protein Coding	P02787	57	GC03P136239	1.35189
TTR	Transthyretin	Protein Coding	P02766	55	GC18P031557	1.35189
MIR30B	MicroRNA 30b	RNA Gene		24	GC08M134800	1.35189
SNORD55	Small Nucleolar RNA, C/D Box 55	RNA Gene		20	GC01P045606	1.35189
APOA1	Apolipoprotein A1	Protein Coding	P02647	57	GC11M116835	1.31975
PFKL	Phosphofructokinase, Liver Type	Protein Coding	P17858	52	GC21P044300	1.28473
CDKN1C	Cyclin Dependent Kinase Inhibitor 1C	Protein Coding	P49918	52	GC11M008066	1.28288
POLR1C	RNA Polymerase I And III Subunit C	Protein Coding	O15160	51	GC06P104306	1.28288
MAFTRR	MAF Transcriptional Regulator RNA	RNA Gene		16	GC16M079657	1.26186
PTGS2	Prostaglandin-Endoperoxide Synthase 2	Protein Coding	P35354	56	GC01M186671	1.20701
CNTN5	Contactin 5	Protein Coding	O94779	44	GC11P099020	1.20624
ZNF724	Zinc Finger Protein 724	Protein Coding	A8MTY0	29	GC19M079307	1.20624
MIR302F	MicroRNA 302f	RNA Gene		13	GC18P030298	1.20624
SLC2A9-AS1	SLC2A9 Antisense RNA 1	RNA Gene		11	GC04P009988	1.13115
ADRB2	Adrenoceptor Beta 2	Protein Coding	P07550	55	GC05P148825	1.12981
ADRA2A	Adrenoceptor Alpha 2A	Protein Coding	P08913	52	GC10P111077	1.12981
SLC2A5	Solute Carrier Family 2 Member 5	Protein Coding	P22732	50	GC01M010143	1.12626
APOC3	Apolipoprotein C3	Protein Coding	P02656	52	GC11P116829	1.10429
MT-ND2	Mitochondrially Encoded NADH:Ubiquinone Oxidoreductase Core Subunit 2	Protein Coding	P03891	40	GCMTP004472	1.07757
CCL2	C-C Motif Chemokine Ligand 2	Protein Coding	P13500	55	GC17P034255	1.04948
GSR	Glutathione-Disulfide Reductase	Protein Coding	P00390	56	GC08M030678	1.04868
PFKP	Phosphofructokinase, Platelet	Protein Coding	Q01813	52	GC10P003066	1.03993
CASQ1	Calsequestrin 1	Protein Coding	P31415	50	GC01P160190	1.03993
FHL3	Four And A Half LIM Domains 3	Protein Coding	Q13643	48	GC01M038266	1.03993
TRIM72	Tripartite Motif Containing 72	Protein Coding	Q6ZMU5	42	GC16P047819	1.03993
CALML4	Calmodulin Like 4	Protein Coding	Q96GE6	41	GC15M068190	1.03993
DBNDD1	Dysbindin Domain Containing 1	Protein Coding	Q9H9R9	38	GC16M090004	1.03993
ALPK1	Alpha Kinase 1	Protein Coding	Q96QP1	46	GC04P112285	1.00521
BAZ1B	Bromodomain Adjacent To Zinc Finger Domain 1B	Protein Coding	Q9UIG0	49	GC07M073440	1.00443
WDR1	WD Repeat Domain 1	Protein Coding	O75083	47	GC04M010073	1.00443
SLC12A3	Solute Carrier Family 12 Member 3	Protein Coding	P55017	54	GC16P056865	0.998922
TGFB1	Transforming Growth Factor Beta 1	Protein Coding	P01137	60	GC19M041301	0.98816
SLC2A6	Solute Carrier Family 2 Member 6	Protein Coding	Q9UGQ3	47	GC09M133471	0.976986
IFNG	Interferon Gamma	Protein Coding	P01579	57	GC12M068154	0.954188
NOS3	Nitric Oxide Synthase 3	Protein Coding	P29474	56	GC07P152342	0.954188
APOA4	Apolipoprotein A4	Protein Coding	P06727	48	GC11M116820	0.954188
EDN1	Endothelin 1	Protein Coding	P05305	56	GC06P012236	0.917246
SOD2-OT1	SOD2 Overlapping Transcript 1	RNA Gene		14	GC06M159772	0.89419
ADIPOQ	Adiponectin, C1Q And Collagen Domain Containing	Protein Coding	Q15848	52	GC03P186842	0.876383
GCKR	Glucokinase Regulator	Protein Coding	Q14397	47	GC02P027496	0.876383
CYP2C8	Cytochrome P450 Family 2 Subfamily C Member 8	Protein Coding	P10632	53	GC10M095038	0.832109
CYP2E1	Cytochrome P450 Family 2 Subfamily E Member 1	Protein Coding	P05181	53	GC10P133520	0.832109
IL1R1	Interleukin 1 Receptor Type 1	Protein Coding	P14778	53	GC02P102136	0.832109
IL18	Interleukin 18	Protein Coding	Q14116	50	GC11M112143	0.832109
MEFV	MEFV Innate Immunity Regulator, Pyrin	Protein Coding	O15553	50	GC16M010625	0.832109
NLRP1	NLR Family Pyrin Domain Containing 1	Protein Coding	Q9C000	50	GC17M005499	0.832109
S100A9	S100 Calcium Binding Protein A9	Protein Coding	P06702	50	GC01P153357	0.832109
IL1RAPL2	Interleukin 1 Receptor Accessory Protein Like 2	Protein Coding	Q9NP60	46	GC0XP104566	0.832109
IGF1R	Insulin Like Growth Factor 1 Receptor	Protein Coding	P08069	61	GC15P098648	0.831334
GNAS	GNAS Complex Locus	Protein Coding	P84996	57	GC20P058839	0.831334
KCNQ1	Potassium Voltage-Gated Channel Subfamily Q Member 1	Protein Coding	P51787	57	GC11P002444	0.831334
NFATC1	Nuclear Factor Of Activated T Cells 1	Protein Coding	O95644	54	GC18P079395	0.831334
NQO1	NAD(P)H Quinone Dehydrogenase 1	Protein Coding	P15559	54	GC16M069706	0.831334
DRD5	Dopamine Receptor D5	Protein Coding	P21918	53	GC04P009783	0.831334
DPEP1	Dipeptidase 1	Protein Coding	P16444	50	GC16P089613	0.831334
SLC22A18	Solute Carrier Family 22 Member 18	Protein Coding	Q96BI1	50	GC11P002899	0.831334
LRIG1	Leucine Rich Repeats And Immunoglobulin Like Domains 1	Protein Coding	Q96JA1	49	GC03M066379	0.831334
NFAT5	Nuclear Factor Of Activated T Cells 5	Protein Coding	O94916	49	GC16P069565	0.831334
RREB1	Ras Responsive Element Binding Protein 1	Protein Coding	Q92766	49	GC06P007107	0.831334
CYB5B	Cytochrome B5 Type B	Protein Coding	O43169	48	GC16P069546	0.831334
ETV5	ETS Variant Transcription Factor 5	Protein Coding	P41161	46	GC03M186046	0.831334
NELFCD	Negative Elongation Factor Complex Member C/D	Protein Coding	Q8IXH7	45	GC20P058981	0.831334
SIPA1L3	Signal Induced Proliferation Associated 1 Like 3	Protein Coding	O60292	45	GC19P083210	0.831334
SUCNR1	Succinate Receptor 1	Protein Coding	Q9BXA5	45	GC03P151873	0.831334
WDR72	WD Repeat Domain 72	Protein Coding	Q3MJ13	45	GC15M136766	0.831334
BCAS1	Brain Enriched Myelin Associated Protein 1	Protein Coding	O75363	44	GC20M053936	0.831334
FCHO2	FCH And Mu Domain Containing Endocytic Adaptor 2	Protein Coding	Q0JRZ9	44	GC05P074558	0.831334
SLC25A26	Solute Carrier Family 25 Member 26	Protein Coding	Q70HW3	44	GC03P066120	0.831334
SFMBT1	Scm Like With Four Mbt Domains 1	Protein Coding	Q9UHJ3	43	GC03M052992	0.831334
CLNK	Cytokine Dependent Hematopoietic Cell Linker	Protein Coding	Q7Z7G1	42	GC04M010491	0.831334
TMEM63B	Transmembrane Protein 63B	Protein Coding	Q5T3F8	41	GC06P104312	0.831334
SSUH2	Ssu-2 Homolog	Protein Coding	Q9Y2M2	40	GC03M008619	0.831334
FAM53A	Family With Sequence Similarity 53 Member A	Protein Coding	Q6NSI3	38	GC04M003279	0.831334
TMEM174	Transmembrane Protein 174	Protein Coding	Q8WUU8	38	GC05P073173	0.831334
ZNF518B	Zinc Finger Protein 518B	Protein Coding	Q9C0D4	38	GC04M010442	0.831334
MALRD1	MAM And LDL Receptor Class A Domain Containing 1	Protein Coding	Q5VYJ5	36	GC10P019048	0.831334
IGF2-AS	IGF2 Antisense RNA	RNA Gene	Q6U949	31	GC11P002140	0.831334
KCNQ1OT1	KCNQ1 Opposite Strand/Antisense Transcript 1	RNA Gene		30	GC11M008063	0.831334
ZNF730	Zinc Finger Protein 730	Protein Coding	Q6ZMV8	29	GC19P082962	0.831334
KCNQ1-AS1	KCNQ1 Antisense RNA 1	RNA Gene		20	GC11M008064	0.831334
LMCD1-AS1	LMCD1 Antisense RNA 1	RNA Gene		18	GC03M007928	0.831334
MIR1538	MicroRNA 1538	RNA Gene		16	GC16M071750	0.831334
AADACL2-AS1	AADACL2 Antisense RNA 1	RNA Gene		15	GC03M151538	0.831334
OR7E35P	Olfactory Receptor Family 7 Subfamily E Member 35 Pseudogene	Pseudogene		13	GC04P009756	0.831334
RNU1-36P	RNA, U1 Small Nuclear 36, Pseudogene	Pseudogene		10	GC04P088000	0.831334
RAF1P1	RAF1 Pseudogene 1	Pseudogene		9	GC04M010256	0.831334
ARMC10P1	Armadillo Repeat Containing 10 Pseudogene 1	Pseudogene		8	GC03M094505	0.831334
ENSG00000289034	Novel Transcript	RNA Gene		7	GC04M088006	0.831334
LOC124904333	Octapeptide-Repeat Protein T2	Protein Coding		7	GC18P079419	0.831334
L13304-014		RNA Gene		6	GC16M071747	0.831334
NONHSAG007430.2		RNA Gene		6	GC11P002445	0.831334
SLC2A9-AS1-001		RNA Gene		6	GC04P010009	0.831334
lnc-CTSZ-1		RNA Gene		6	GC20M058901	0.831334
lnc-DRD5-4		RNA Gene		6	GC04P021645	0.831334
lnc-PQLC1-16		RNA Gene		6	GC18M079397	0.831334
lnc-SLC22A18-3		RNA Gene		6	GC11P002826	0.831334
HSALNG0026630		RNA Gene		5	GC03M066378	0.831334
HSALNG0026632		RNA Gene		5	GC03M066430	0.831334
HSALNG0050233		RNA Gene		5	GC06P105558	0.831334
HSALNG0082234		RNA Gene		5	GC11M002509	0.831334
NONHSAG032159.2-001		RNA Gene		5	GC20P058889	0.831334
lnc-WDR1-8		RNA Gene		5	GC04M009985	0.831334
piR-41525-504		RNA Gene		5	GC04M010331	0.831334
piR-49061		RNA Gene		5	GC11P002968	0.831334
CM034961-025		RNA Gene		4	GC11M008493	0.831334
HSALNG0032849		RNA Gene		4	GC04P009982	0.831334
HSALNG0032878		RNA Gene		4	GC04P021568	0.831334
NONHSAG032159.2-002		RNA Gene		4	GC20P058905	0.831334
NONHSAG043834.2-002		RNA Gene		4	GC06P109042	0.831334
RF00017-2139		RNA Gene		4	GC16P069649	0.831334
piR-31926-024		RNA Gene		4	GC05P073129	0.831334
HSALNG0078466-244		RNA Gene		3	GC16P069665	0.831334
KCNJ1	Potassium Inwardly Rectifying Channel Subfamily J Member 1	Protein Coding	P48048	55	GC11M128741	0.826444
GCK	Glucokinase	Protein Coding	P35557	56	GC07M044807	0.811675
MIR33B	MicroRNA 33b	RNA Gene		22	GC17M017813	0.803889
THBD	Thrombomodulin	Protein Coding	P07204	53	GC20M023026	0.797736
ABL1	ABL Proto-Oncogene 1, Non-Receptor Tyrosine Kinase	Protein Coding	P00519	60	GC09P130713	0.782096
RYR1	Ryanodine Receptor 1	Protein Coding	P21817	54	GC19P083224	0.782096
PPP1R3A	Protein Phosphatase 1 Regulatory Subunit 3A	Protein Coding	Q16821	49	GC07M113876	0.782096
PYGB	Glycogen Phosphorylase B	Protein Coding	P11216	49	GC20P025248	0.782096
TSC2	TSC Complex Subunit 2	Protein Coding	P49815	57	GC16P045943	0.774985
KL	Klotho	Protein Coding	Q9UEF7	54	GC13P033016	0.761956
CD14	CD14 Molecule	Protein Coding	P08571	53	GC05M140631	0.761956
ATG2A	Autophagy Related 2A	Protein Coding	Q2TAZ0	45	GC11M109199	0.761956
CFAP298	Cilia And Flagella Associated Protein 298	Protein Coding	P57076	45	GC21M032593	0.761956
PIK3C2A	Phosphatidylinositol-4-Phosphate 3-Kinase Catalytic Subunit Type 2 Alpha	Protein Coding	O00443	54	GC11M017772	0.751355
TLR2	Toll Like Receptor 2	Protein Coding	O60603	58	GC04P153684	0.721094
B2M	Beta-2-Microglobulin	Protein Coding	P61769	56	GC15P044711	0.721094
KHK	Ketohexokinase	Protein Coding	P50053	52	GC02P027086	0.696339
G6PD	Glucose-6-Phosphate Dehydrogenase	Protein Coding	P11413	57	GC0XM154578	0.674713
IGF1	Insulin Like Growth Factor 1	Protein Coding	P05019	55	GC12M102395	0.674713
HBG2	Hemoglobin Subunit Gamma 2	Protein Coding	P69892	48	GC11M008315	0.674713
PARP1	Poly(ADP-Ribose) Polymerase 1	Protein Coding	P09874	57	GC01M226360	0.638579
CDKN1A	Cyclin Dependent Kinase Inhibitor 1A	Protein Coding	P38936	56	GC06P104241	0.638579
CPT2	Carnitine Palmitoyltransferase 2	Protein Coding	P23786	56	GC01P053196	0.638579
CYP11A1	Cytochrome P450 Family 11 Subfamily A Member 1	Protein Coding	P05108	54	GC15M074337	0.638579
HADH	Hydroxyacyl-CoA Dehydrogenase	Protein Coding	Q16836	54	GC04P107989	0.638579
POMC	Proopiomelanocortin	Protein Coding	P01189	54	GC02M025160	0.638579
ABCC8	ATP Binding Cassette Subfamily C Member 8	Protein Coding	Q09428	53	GC11M017392	0.638579
MB	Myoglobin	Protein Coding	P02144	51	GC22M035606	0.638579
AIRE	Autoimmune Regulator	Protein Coding	O43918	50	GC21P044285	0.638579
CCR6	C-C Motif Chemokine Receptor 6	Protein Coding	P51684	50	GC06P167111	0.638579
CHKB	Choline Kinase Beta	Protein Coding	Q9Y259	50	GC22M050578	0.638579
CYP21A2	Cytochrome P450 Family 21 Subfamily A Member 2	Protein Coding	P08686	50	GC06P104122	0.638579
PHKG1	Phosphorylase Kinase Catalytic Subunit Gamma 1	Protein Coding	Q16816	50	GC07M056080	0.638579
ALG2	ALG2 Alpha-1,3/1,6-Mannosyltransferase	Protein Coding	Q9H553	49	GC09M099216	0.638579
FXYD2	FXYD Domain Containing Ion Transport Regulator 2	Protein Coding	P54710	49	GC11M117800	0.638579
KCNT1	Potassium Sodium-Activated Channel Subfamily T Member 1	Protein Coding	Q5JUK3	49	GC09P135702	0.638579
GYG2	Glycogenin 2	Protein Coding	O15488	46	GC0XP002828	0.638579
PPP1R3B	Protein Phosphatase 1 Regulatory Subunit 3B	Protein Coding	Q86XI6	42	GC08M009136	0.638579
PPP1R3D	Protein Phosphatase 1 Regulatory Subunit 3D	Protein Coding	O95685	40	GC20M059936	0.638579
H2AC18	H2A Clustered Histone 18	Protein Coding	Q6FI13	36	GC01M155818	0.638579
MAPK1	Mitogen-Activated Protein Kinase 1	Protein Coding	P28482	60	GC22M021759	0.62464
LMNA	Lamin A/C	Protein Coding	P02545	57	GC01P156082	0.62464
TNFRSF10B	TNF Receptor Superfamily Member 10b	Protein Coding	O14763	57	GC08M023020	0.62464
BIRC5	Baculoviral IAP Repeat Containing 5	Protein Coding	O15392	52	GC17P078214	0.62464
ECHS1	Enoyl-CoA Hydratase, Short Chain 1	Protein Coding	P30084	52	GC10M133362	0.62464
SLC25A20	Solute Carrier Family 25 Member 20	Protein Coding	O43772	52	GC03M048893	0.62464
EPO	Erythropoietin	Protein Coding	P01588	49	GC07P100720	0.62464
IFI27	Interferon Alpha Inducible Protein 27	Protein Coding	P40305	45	GC14P094104	0.62464
AGT	Angiotensinogen	Protein Coding	P01019	56	GC01M230690	0.619696
ADH1B	Alcohol Dehydrogenase 1B (Class I), Beta Polypeptide	Protein Coding	P00325	51	GC04M099304	0.619696
CYP2C19	Cytochrome P450 Family 2 Subfamily C Member 19	Protein Coding	P33261	50	GC10P094762	0.619696
COG2	Component Of Oligomeric Golgi Complex 2	Protein Coding	Q14746	47	GC01P230642	0.619696
KLF2	KLF Transcription Factor 2	Protein Coding	Q9Y5W3	46	GC19P082804	0.619696
MIR92A1	MicroRNA 92a-1	RNA Gene		22	GC13P091616	0.619696
MIR92A2	MicroRNA 92a-2	RNA Gene		18	GC0XM134375	0.619696
ESR1	Estrogen Receptor 1	Protein Coding	P03372	61	GC06P151656	0.547997
NFE2L2	NFE2 Like BZIP Transcription Factor 2	Protein Coding	Q16236	58	GC02M177227	0.547997
C3	Complement C3	Protein Coding	P01024	56	GC19M006677	0.547997
ATP6AP2	ATPase H+ Transporting Accessory Protein 2	Protein Coding	O75787	52	GC0XP040588	0.547997
ELN	Elastin	Protein Coding	P15502	50	GC07P074027	0.547997
SELE	Selectin E	Protein Coding	P16581	50	GC01M169722	0.547997
P2RY6	Pyrimidinergic Receptor P2Y6	Protein Coding	Q15077	48	GC11P073264	0.547997
OIT3	Oncoprotein Induced Transcript 3	Protein Coding	Q8WWZ8	41	GC10P072893	0.53019
ACE	Angiotensin I Converting Enzyme	Protein Coding	P12821	58	GC17P063477	0.489591
FABP2	Fatty Acid Binding Protein 2	Protein Coding	P12104	48	GC04M119317	0.45797
AKT2	AKT Serine/Threonine Kinase 2	Protein Coding	P31751	61	GC19M040230	0.451543
CDK4	Cyclin Dependent Kinase 4	Protein Coding	P11802	61	GC12M058711	0.451543
ATM	ATM Serine/Threonine Kinase	Protein Coding	Q13315	60	GC11P108222	0.451543
EP300	E1A Binding Protein P300	Protein Coding	Q09472	60	GC22P052546	0.451543
JAK2	Janus Kinase 2	Protein Coding	O60674	60	GC09P004985	0.451543
MDM2	MDM2 Proto-Oncogene	Protein Coding	Q00987	60	GC12P068808	0.451543
MPO	Myeloperoxidase	Protein Coding	P05164	60	GC17M058269	0.451543
NFKB1	Nuclear Factor Kappa B Subunit 1	Protein Coding	P19838	60	GC04P102501	0.451543
PDGFRA	Platelet Derived Growth Factor Receptor Alpha	Protein Coding	P16234	60	GC04P054229	0.451543
STAT1	Signal Transducer And Activator Of Transcription 1	Protein Coding	P42224	60	GC02M190908	0.451543
TP53	Tumor Protein P53	Protein Coding	P04637	60	GC17M007661	0.451543
CASP8	Caspase 8	Protein Coding	Q14790	59	GC02P201233	0.451543
CXCR4	C-X-C Motif Chemokine Receptor 4	Protein Coding	P61073	59	GC02M136114	0.451543
BCL2	BCL2 Apoptosis Regulator	Protein Coding	P10415	58	GC18M063123	0.451543
BCR	BCR Activator Of RhoGEF And GTPase	Protein Coding	P11274	58	GC22P023179	0.451543
CD19	CD19 Molecule	Protein Coding	P15391	58	GC16P046954	0.451543
CDK6	Cyclin Dependent Kinase 6	Protein Coding	Q00534	58	GC07M092604	0.451543
CDKN2A	Cyclin Dependent Kinase Inhibitor 2A	Protein Coding	Q8N726	58	GC09M021967	0.451543
PTCH1	Patched 1	Protein Coding	Q13635	58	GC09M095442	0.451543
SMO	Smoothened, Frizzled Class Receptor	Protein Coding	Q99835	58	GC07P133426	0.451543
XIAP	X-Linked Inhibitor Of Apoptosis	Protein Coding	P98170	58	GC0XP123859	0.451543
ZAP70	Zeta Chain Of T Cell Receptor Associated Protein Kinase 70	Protein Coding	P43403	58	GC02P097817	0.451543
ALK	ALK Receptor Tyrosine Kinase	Protein Coding	Q9UM73	57	GC02M029190	0.451543
BAX	BCL2 Associated X, Apoptosis Regulator	Protein Coding	Q07812	57	GC19P048954	0.451543
BRCA1	BRCA1 DNA Repair Associated	Protein Coding	P38398	57	GC17M043044	0.451543
CD40	CD40 Molecule	Protein Coding	P25942	57	GC20P046118	0.451543
DDC	Dopa Decarboxylase	Protein Coding	P20711	57	GC07M050458	0.451543
FAS	Fas Cell Surface Death Receptor	Protein Coding	P25445	57	GC10P098532	0.451543
ICAM1	Intercellular Adhesion Molecule 1	Protein Coding	P05362	57	GC19P011104	0.451543
LDHA	Lactate Dehydrogenase A	Protein Coding	P00338	57	GC11P018394	0.451543
MME	Membrane Metalloendopeptidase	Protein Coding	P08473	57	GC03P155024	0.451543
NFKBIA	NFKB Inhibitor Alpha	Protein Coding	P25963	57	GC14M035401	0.451543
SMARCA2	SWI/SNF Related, Matrix Associated, Actin Dependent Regulator Of Chromatin, Subfamily A, Member 2	Protein Coding	P51531	57	GC09P001980	0.451543
SYK	Spleen Associated Tyrosine Kinase	Protein Coding	P43405	57	GC09P094897	0.451543
BLK	BLK Proto-Oncogene, Src Family Tyrosine Kinase	Protein Coding	P51451	56	GC08P011486	0.451543
CASP3	Caspase 3	Protein Coding	P42574	56	GC04M184627	0.451543
CD55	CD55 Molecule (Cromer Blood Group)	Protein Coding	P08174	56	GC01P207321	0.451543
CYP17A1	Cytochrome P450 Family 17 Subfamily A Member 1	Protein Coding	P05093	56	GC10M102830	0.451543
DRD2	Dopamine Receptor D2	Protein Coding	P14416	56	GC11M113409	0.451543
HNF4A	Hepatocyte Nuclear Factor 4 Alpha	Protein Coding	P41235	56	GC20P044355	0.451543
MAPK8	Mitogen-Activated Protein Kinase 8	Protein Coding	P45983	56	GC10P048306	0.451543
MYB	MYB Proto-Oncogene, Transcription Factor	Protein Coding	P10242	56	GC06P135180	0.451543
NR5A1	Nuclear Receptor Subfamily 5 Group A Member 1	Protein Coding	Q13285	56	GC09M124481	0.451543
PIK3CG	Phosphatidylinositol-4,5-Bisphosphate 3-Kinase Catalytic Subunit Gamma	Protein Coding	P48736	56	GC07P106865	0.451543
PLAT	Plasminogen Activator, Tissue Type	Protein Coding	P00750	56	GC08M042174	0.451543
PTPN6	Protein Tyrosine Phosphatase Non-Receptor Type 6	Protein Coding	P29350	56	GC12P028322	0.451543
RIPK1	Receptor Interacting Serine/Threonine Kinase 1	Protein Coding	Q13546	56	GC06P003520	0.451543
SERPINA1	Serpin Family A Member 1	Protein Coding	P01009	56	GC14M094376	0.451543
SIRT1	Sirtuin 1	Protein Coding	Q96EB6	56	GC10P067884	0.451543
TNFSF11	TNF Superfamily Member 11	Protein Coding	O14788	56	GC13P042562	0.451543
ABCC1	ATP Binding Cassette Subfamily C Member 1	Protein Coding	P33527	55	GC16P015949	0.451543
ATP2A1	ATPase Sarcoplasmic/Endoplasmic Reticulum Ca2+ Transporting 1	Protein Coding	O14983	55	GC16P046943	0.451543
CCND2	Cyclin D2	Protein Coding	P30279	55	GC12P028136	0.451543
CD44	CD44 Molecule (Indian Blood Group)	Protein Coding	P16070	55	GC11P035139	0.451543
CDK1	Cyclin Dependent Kinase 1	Protein Coding	P06493	55	GC10P060772	0.451543
CHAT	Choline O-Acetyltransferase	Protein Coding	P28329	55	GC10P049609	0.451543
DHFR	Dihydrofolate Reductase	Protein Coding	P00374	55	GC05M080626	0.451543
FASLG	Fas Ligand	Protein Coding	P48023	55	GC01P172659	0.451543
FCGR2B	Fc Gamma Receptor IIb	Protein Coding	P31994	55	GC01P161976	0.451543
ITGA4	Integrin Subunit Alpha 4	Protein Coding	P13612	55	GC02P181456	0.451543
LYN	LYN Proto-Oncogene, Src Family Tyrosine Kinase	Protein Coding	P07948	55	GC08P055879	0.451543
PBX1	PBX Homeobox 1	Protein Coding	P40424	55	GC01P164524	0.451543
RB1	RB Transcriptional Corepressor 1	Protein Coding	P06400	55	GC13P048303	0.451543
TPO	Thyroid Peroxidase	Protein Coding	P07202	55	GC02P001374	0.451543
YY1	YY1 Transcription Factor	Protein Coding	P25490	55	GC14P100238	0.451543
ALDH1A1	Aldehyde Dehydrogenase 1 Family Member A1	Protein Coding	P00352	54	GC09M072900	0.451543
BCL2L1	BCL2 Like 1	Protein Coding	Q07817	54	GC20M031664	0.451543
BIRC2	Baculoviral IAP Repeat Containing 2	Protein Coding	Q13490	54	GC11P102347	0.451543
CASP9	Caspase 9	Protein Coding	P55211	54	GC01M015491	0.451543
CD27	CD27 Molecule	Protein Coding	P26842	54	GC12P028168	0.451543
CD46	CD46 Molecule	Protein Coding	P15529	54	GC01P207752	0.451543
CSF3R	Colony Stimulating Factor 3 Receptor	Protein Coding	Q99062	54	GC01M036466	0.451543
CTLA4	Cytotoxic T-Lymphocyte Associated Protein 4	Protein Coding	P16410	54	GC02P203854	0.451543
DES	Desmin	Protein Coding	P17661	54	GC02P219418	0.451543
ERCC2	ERCC Excision Repair 2, TFIIH Core Complex Helicase Subunit	Protein Coding	P18074	54	GC19M045349	0.451543
ERCC3	ERCC Excision Repair 3, TFIIH Core Complex Helicase Subunit	Protein Coding	P19447	54	GC02M127257	0.451543
ESRRB	Estrogen Related Receptor Beta	Protein Coding	O95718	54	GC14P076310	0.451543
F5	Coagulation Factor V	Protein Coding	P12259	54	GC01M169511	0.451543
F8	Coagulation Factor VIII	Protein Coding	P00451	54	GC0XM154835	0.451543
ITCH	Itchy E3 Ubiquitin Protein Ligase	Protein Coding	Q96J02	54	GC20P034363	0.451543
LIG1	DNA Ligase 1	Protein Coding	P18858	54	GC19M048115	0.451543
LIPE	Lipase E, Hormone Sensitive Type	Protein Coding	Q05469	54	GC19M042401	0.451543
MAN1B1	Mannosidase Alpha Class 1B Member 1	Protein Coding	Q9UKM7	54	GC09P137086	0.451543
MCL1	MCL1 Apoptosis Regulator, BCL2 Family Member	Protein Coding	Q07820	54	GC01M155854	0.451543
MS4A1	Membrane Spanning 4-Domains A1	Protein Coding	P11836	54	GC11P060545	0.451543
MYCN	MYCN Proto-Oncogene, BHLH Transcription Factor	Protein Coding	P04198	54	GC02P015951	0.451543
NEDD4	NEDD4 E3 Ubiquitin Protein Ligase	Protein Coding	P46934	54	GC15M055826	0.451543
OAT	Ornithine Aminotransferase	Protein Coding	P04181	54	GC10M124397	0.451543
OGG1	8-Oxoguanine DNA Glycosylase	Protein Coding	O15527	54	GC03P014579	0.451543
PCYT1A	Phosphate Cytidylyltransferase 1A, Choline	Protein Coding	P49585	54	GC03M196214	0.451543
PGM1	Phosphoglucomutase 1	Protein Coding	P36871	54	GC01P063593	0.451543
SETD2	SET Domain Containing 2, Histone Lysine Methyltransferase	Protein Coding	Q9BYW2	54	GC03M047033	0.451543
TYRP1	Tyrosinase Related Protein 1	Protein Coding	P17643	54	GC09P012683	0.451543
VWF	Von Willebrand Factor	Protein Coding	P04275	54	GC12M006031	0.451543
ACADM	Acyl-CoA Dehydrogenase Medium Chain	Protein Coding	P11310	53	GC01P075724	0.451543
ACTN4	Actinin Alpha 4	Protein Coding	O43707	53	GC19P038647	0.451543
ANXA5	Annexin A5	Protein Coding	P08758	53	GC04M121667	0.451543
B4GALT1	Beta-1,4-Galactosyltransferase 1	Protein Coding	P15291	53	GC09M033100	0.451543
BCL6	BCL6 Transcription Repressor	Protein Coding	P41182	53	GC03M187721	0.451543
BIRC3	Baculoviral IAP Repeat Containing 3	Protein Coding	Q13489	53	GC11P102317	0.451543
CCND3	Cyclin D3	Protein Coding	P30281	53	GC06M041934	0.451543
CCNH	Cyclin H	Protein Coding	P51946	53	GC05M087311	0.451543
CD38	CD38 Molecule	Protein Coding	P28907	53	GC04P021471	0.451543
CD59	CD59 Molecule (CD59 Blood Group)	Protein Coding	P13987	53	GC11M033704	0.451543
CDKN2B	Cyclin Dependent Kinase Inhibitor 2B	Protein Coding	P42772	53	GC09M022002	0.451543
CR2	Complement C3d Receptor 2	Protein Coding	P20023	53	GC01P207454	0.451543
CYP11B2	Cytochrome P450 Family 11 Subfamily B Member 2	Protein Coding	P19099	53	GC08M142910	0.451543
CYP27B1	Cytochrome P450 Family 27 Subfamily B Member 1	Protein Coding	O15528	53	GC12M058692	0.451543
DDB1	Damage Specific DNA Binding Protein 1	Protein Coding	Q16531	53	GC11M109043	0.451543
DDB2	Damage Specific DNA Binding Protein 2	Protein Coding	Q92466	53	GC11P047237	0.451543
ERCC1	ERCC Excision Repair 1, Endonuclease Non-Catalytic Subunit	Protein Coding	P07992	53	GC19M079717	0.451543
FEN1	Flap Structure-Specific Endonuclease 1	Protein Coding	P39748	53	GC11P061793	0.451543
GRHPR	Glyoxylate And Hydroxypyruvate Reductase	Protein Coding	Q9UBQ7	53	GC09P052051	0.451543
HADHA	Hydroxyacyl-CoA Dehydrogenase Trifunctional Multienzyme Complex Subunit Alpha	Protein Coding	P40939	53	GC02M026190	0.451543
HSD17B10	Hydroxysteroid 17-Beta Dehydrogenase 10	Protein Coding	Q99714	53	GC0XM053431	0.451543
HTR1A	5-Hydroxytryptamine Receptor 1A	Protein Coding	P08908	53	GC05M063960	0.451543
IL4	Interleukin 4	Protein Coding	P05112	53	GC05P132673	0.451543
KCNJ11	Potassium Inwardly Rectifying Channel Subfamily J Member 11	Protein Coding	Q14654	53	GC11M017780	0.451543
MAT1A	Methionine Adenosyltransferase 1A	Protein Coding	Q00266	53	GC10M080271	0.451543
MC2R	Melanocortin 2 Receptor	Protein Coding	Q01718	53	GC18M030188	0.451543
NR0B1	Nuclear Receptor Subfamily 0 Group B Member 1	Protein Coding	P51843	53	GC0XM030304	0.451543
OTC	Ornithine Transcarbamylase	Protein Coding	P00480	53	GC0XP038330	0.451543
PAX5	Paired Box 5	Protein Coding	Q02548	53	GC09M036941	0.451543
PDX1	Pancreatic And Duodenal Homeobox 1	Protein Coding	P52945	53	GC13P027921	0.451543
PLIN1	Perilipin 1	Protein Coding	O60240	53	GC15M089664	0.451543
PMM2	Phosphomannomutase 2	Protein Coding	O15305	53	GC16P008788	0.451543
ROS1	ROS Proto-Oncogene 1, Receptor Tyrosine Kinase	Protein Coding	P08922	53	GC06M117287	0.451543
SH2D1A	SH2 Domain Containing 1A	Protein Coding	O60880	53	GC0XP124227	0.451543
SLC7A7	Solute Carrier Family 7 Member 7	Protein Coding	Q9UM01	53	GC14M022773	0.451543
WRN	WRN RecQ Like Helicase	Protein Coding	Q14191	53	GC08P031033	0.451543
XPC	XPC Complex Subunit, DNA Damage Recognition And Repair Factor	Protein Coding	Q01831	53	GC03M023368	0.451543
ACADS	Acyl-CoA Dehydrogenase Short Chain	Protein Coding	P16219	52	GC12P128210	0.451543
ACADVL	Acyl-CoA Dehydrogenase Very Long Chain	Protein Coding	P49748	52	GC17P012975	0.451543
AGPAT2	1-Acylglycerol-3-Phosphate O-Acyltransferase 2	Protein Coding	O15120	52	GC09M136673	0.451543
AGXT	Alanine--Glyoxylate Aminotransferase	Protein Coding	P21549	52	GC02P240868	0.451543
ALG1	ALG1 Chitobiosyldiphosphodolichol Beta-Mannosyltransferase	Protein Coding	Q9BT22	52	GC16P005033	0.451543
APEX1	Apurinic/Apyrimidinic Endodeoxyribonuclease 1	Protein Coding	P27695	52	GC14P020455	0.451543
BCL2L11	BCL2 Like 11	Protein Coding	O43521	52	GC02P111119	0.451543
CCNA2	Cyclin A2	Protein Coding	P20248	52	GC04M121816	0.451543
CDK7	Cyclin Dependent Kinase 7	Protein Coding	P50613	52	GC05P069484	0.451543
CYP2D6	Cytochrome P450 Family 2 Subfamily D Member 6	Protein Coding	P10635	52	GC22M042126	0.451543
DLL1	Delta Like Canonical Notch Ligand 1	Protein Coding	O00548	52	GC06M170282	0.451543
ERCC5	ERCC Excision Repair 5, Endonuclease	Protein Coding	P28715	52	GC13P102845	0.451543
ETFDH	Electron Transfer Flavoprotein Dehydrogenase	Protein Coding	Q16134	52	GC04P158672	0.451543
GK	Glycerol Kinase	Protein Coding	P32189	52	GC0XP031203	0.451543
HELLS	Helicase, Lymphoid Specific	Protein Coding	Q9NRZ9	52	GC10P098635	0.451543
HSD3B2	Hydroxy-Delta-5-Steroid Dehydrogenase, 3 Beta- And Steroid Delta-Isomerase 2	Protein Coding	P26439	52	GC01P119414	0.451543
HTR3A	5-Hydroxytryptamine Receptor 3A	Protein Coding	P46098	52	GC11P113975	0.451543
IL10RA	Interleukin 10 Receptor Subunit Alpha	Protein Coding	Q13651	52	GC11P117987	0.451543
NME1	NME/NM23 Nucleoside Diphosphate Kinase 1	Protein Coding	P15531	52	GC17P078654	0.451543
NME2	NME/NM23 Nucleoside Diphosphate Kinase 2	Protein Coding	P22392	52	GC17P051165	0.451543
PARP2	Poly(ADP-Ribose) Polymerase 2	Protein Coding	Q9UGN5	52	GC14P020343	0.451543
PAX8	Paired Box 8	Protein Coding	Q06710	52	GC02M113215	0.451543
PCBD1	Pterin-4 Alpha-Carbinolamine Dehydratase 1	Protein Coding	P61457	52	GC10M070882	0.451543
POLR2A	RNA Polymerase II Subunit A	Protein Coding	P24928	52	GC17P013016	0.451543
PRDM1	PR/SET Domain 1	Protein Coding	O75626	52	GC06P107226	0.451543
RBL2	RB Transcriptional Corepressor Like 2	Protein Coding	Q08999	52	GC16P053433	0.451543
SLC1A4	Solute Carrier Family 1 Member 4	Protein Coding	P43007	52	GC02P064988	0.451543
TIMP1	TIMP Metallopeptidase Inhibitor 1	Protein Coding	P01033	52	GC0XP047922	0.451543
TLR9	Toll Like Receptor 9	Protein Coding	Q9NR96	52	GC03M052595	0.451543
TNFRSF10A	TNF Receptor Superfamily Member 10a	Protein Coding	O00220	52	GC08M023190	0.451543
TNFSF13B	TNF Superfamily Member 13b	Protein Coding	Q9Y275	52	GC13P108251	0.451543
TP73	Tumor Protein P73	Protein Coding	O15350	52	GC01P003652	0.451543
TPH1	Tryptophan Hydroxylase 1	Protein Coding	P17752	52	GC11M018040	0.451543
TRPM6	Transient Receptor Potential Cation Channel Subfamily M Member 6	Protein Coding	Q9BX84	52	GC09M074725	0.451543
WFS1	Wolframin ER Transmembrane Glycoprotein	Protein Coding	O76024	52	GC04P006269	0.451543
XBP1	X-Box Binding Protein 1	Protein Coding	P17861	52	GC22M028794	0.451543
XPA	XPA, DNA Damage Recognition And Repair Factor	Protein Coding	P23025	52	GC09M097654	0.451543
ATF3	Activating Transcription Factor 3	Protein Coding	P18847	51	GC01P212565	0.451543
ATP6AP1	ATPase H+ Transporting Accessory Protein 1	Protein Coding	Q15904	51	GC0XP154428	0.451543
CFLAR	CASP8 And FADD Like Apoptosis Regulator	Protein Coding	O15519	51	GC02P201341	0.451543
CLCN5	Chloride Voltage-Gated Channel 5	Protein Coding	P51795	51	GC0XP049922	0.451543
E2F4	E2F Transcription Factor 4	Protein Coding	Q16254	51	GC16P067192	0.451543
ID2	Inhibitor Of DNA Binding 2	Protein Coding	Q02363	51	GC02P008678	0.451543
INPP5D	Inositol Polyphosphate-5-Phosphatase D	Protein Coding	Q92835	51	GC02P233059	0.451543
RAD23B	RAD23 Homolog B, Nucleotide Excision Repair Protein	Protein Coding	P54727	51	GC09P107283	0.451543
RAG1	Recombination Activating 1	Protein Coding	P15918	51	GC11P036549	0.451543
SLC1A5	Solute Carrier Family 1 Member 5	Protein Coding	Q15758	51	GC19M079784	0.451543
SLC34A1	Solute Carrier Family 34 Member 1	Protein Coding	Q06495	51	GC05P179202	0.451543
SLC7A11	Solute Carrier Family 7 Member 11	Protein Coding	Q9UPY5	51	GC04M138164	0.451543
SMURF1	SMAD Specific E3 Ubiquitin Protein Ligase 1	Protein Coding	Q9HCE7	51	GC07M099027	0.451543
STAR	Steroidogenic Acute Regulatory Protein	Protein Coding	P49675	51	GC08M038153	0.451543
TG	Thyroglobulin	Protein Coding	P01266	51	GC08P132866	0.451543
ACAA2	Acetyl-CoA Acyltransferase 2	Protein Coding	P42765	50	GC18M049782	0.451543
AICDA	Activation Induced Cytidine Deaminase	Protein Coding	Q9GZX7	50	GC12M008602	0.451543
BDH1	3-Hydroxybutyrate Dehydrogenase 1	Protein Coding	Q02338	50	GC03M197529	0.451543
CCR1	C-C Motif Chemokine Receptor 1	Protein Coding	P32246	50	GC03M046218	0.451543
CHKA	Choline Kinase Alpha	Protein Coding	P35790	50	GC11M068052	0.451543
CRH	Corticotropin Releasing Hormone	Protein Coding	P06850	50	GC08M066176	0.451543
CUL4A	Cullin 4A	Protein Coding	Q13619	50	GC13P113208	0.451543
CXCR3	C-X-C Motif Chemokine Receptor 3	Protein Coding	P49682	50	GC0XM071615	0.451543
F2RL1	F2R Like Trypsin Receptor 1	Protein Coding	P55085	50	GC05P076818	0.451543
FCER2	Fc Epsilon Receptor II	Protein Coding	P06734	50	GC19M009571	0.451543
GYPA	Glycophorin A (MNS Blood Group)	Protein Coding	P02724	50	GC04M144109	0.451543
IL1RAPL1	Interleukin 1 Receptor Accessory Protein Like 1	Protein Coding	Q9NZN1	50	GC0XP028605	0.451543
IL7	Interleukin 7	Protein Coding	P13232	50	GC08M078689	0.451543
MOGS	Mannosyl-Oligosaccharide Glucosidase	Protein Coding	Q13724	50	GC02M074461	0.451543
MPI	Mannose Phosphate Isomerase	Protein Coding	P34949	50	GC15P074890	0.451543
MYO5B	Myosin VB	Protein Coding	Q9ULV0	50	GC18M049822	0.451543
NEUROD1	Neuronal Differentiation 1	Protein Coding	Q13562	50	GC02M181673	0.451543
POU2F1	POU Class 2 Homeobox 1	Protein Coding	P14859	50	GC01P167221	0.451543
PPM1B	Protein Phosphatase, Mg2+/Mn2+ Dependent 1B	Protein Coding	O75688	50	GC02P044167	0.451543
SLC18A3	Solute Carrier Family 18 Member A3	Protein Coding	Q16572	50	GC10P049610	0.451543
SLC1A7	Solute Carrier Family 1 Member 7	Protein Coding	O00341	50	GC01M053087	0.451543
SLC6A19	Solute Carrier Family 6 Member 19	Protein Coding	Q695T7	50	GC05P001201	0.451543
TNFRSF8	TNF Receptor Superfamily Member 8	Protein Coding	P28908	50	GC01P012063	0.451543
TPP2	Tripeptidyl Peptidase 2	Protein Coding	P29144	50	GC13P102596	0.451543
TRADD	TNFRSF1A Associated Via Death Domain	Protein Coding	Q15628	50	GC16M067154	0.451543
XRCC4	X-Ray Repair Cross Complementing 4	Protein Coding	Q13426	50	GC05P083077	0.451543
BMI1	BMI1 Proto-Oncogene, Polycomb Ring Finger	Protein Coding	P35226	49	GC10P022326	0.451543
CALCA	Calcitonin Related Polypeptide Alpha	Protein Coding	P06881	49	GC11M014966	0.451543
CLDN19	Claudin 19	Protein Coding	Q8N6F1	49	GC01M042733	0.451543
DNM3	Dynamin 3	Protein Coding	Q9UQ16	49	GC01P171887	0.451543
FBP2	Fructose-Bisphosphatase 2	Protein Coding	O00757	49	GC09M094558	0.451543
GTF2H1	General Transcription Factor IIH Subunit 1	Protein Coding	P32780	49	GC11P018815	0.451543
HIBCH	3-Hydroxyisobutyryl-CoA Hydrolase	Protein Coding	Q6NVY1	49	GC02M190189	0.451543
HLCS	Holocarboxylase Synthetase	Protein Coding	P50747	49	GC21M036750	0.451543
KDM4C	Lysine Demethylase 4C	Protein Coding	Q9H3R0	49	GC09P006720	0.451543
LGALS1	Galectin 1	Protein Coding	P09382	49	GC22P037675	0.451543
MMADHC	Metabolism Of Cobalamin Associated D	Protein Coding	Q9H3L0	49	GC02M149569	0.451543
PCDH19	Protocadherin 19	Protein Coding	Q8TAB3	49	GC0XM100291	0.451543
POLI	DNA Polymerase Iota	Protein Coding	Q9UNA4	49	GC18P054274	0.451543
SLC35A3	Solute Carrier Family 35 Member A3	Protein Coding	Q9Y2D2	49	GC01P100005	0.451543
SLC3A2	Solute Carrier Family 3 Member 2	Protein Coding	P08195	49	GC11P062856	0.451543
TCL1A	TCL1 Family AKT Coactivator A	Protein Coding	P56279	49	GC14M095709	0.451543
ACAA1	Acetyl-CoA Acyltransferase 1	Protein Coding	P09110	48	GC03M038103	0.451543
CAVIN1	Caveolae Associated Protein 1	Protein Coding	Q6NZI2	48	GC17M060860	0.451543
CETN2	Centrin 2	Protein Coding	P41208	48	GC0XM152827	0.451543
CRHBP	Corticotropin Releasing Hormone Binding Protein	Protein Coding	P24387	48	GC05P076952	0.451543
CXCR5	C-X-C Motif Chemokine Receptor 5	Protein Coding	P32302	48	GC11P118928	0.451543
DNTT	DNA Nucleotidylexotransferase	Protein Coding	P04053	48	GC10P096304	0.451543
GHRL	Ghrelin And Obestatin Prepropeptide	Protein Coding	Q9UBU3	48	GC03M010285	0.451543
GK2	Glycerol Kinase 2	Protein Coding	Q14410	48	GC04M079406	0.451543
HMGN1	High Mobility Group Nucleosome Binding Domain 1	Protein Coding	P05114	48	GC21M039342	0.451543
HOGA1	4-Hydroxy-2-Oxoglutarate Aldolase 1	Protein Coding	Q86XE5	48	GC10P098710	0.451543
ICOSLG	Inducible T Cell Costimulator Ligand	Protein Coding	O75144	48	GC21M044222	0.451543
IFT81	Intraflagellar Transport 81	Protein Coding	Q8WYA0	48	GC12P110124	0.451543
KLHL3	Kelch Like Family Member 3	Protein Coding	Q9UH77	48	GC05M137617	0.451543
PAX4	Paired Box 4	Protein Coding	O43316	48	GC07M127610	0.451543
POLM	DNA Polymerase Mu	Protein Coding	Q9NP87	48	GC07M044796	0.451543
PRRT2	Proline Rich Transmembrane Protein 2	Protein Coding	Q7Z6L0	48	GC16P029811	0.451543
PTF1A	Pancreas Associated Transcription Factor 1a	Protein Coding	Q7RTS3	48	GC10P023194	0.451543
RFX2	Regulatory Factor X2	Protein Coding	P48378	48	GC19M005993	0.451543
RYR3	Ryanodine Receptor 3	Protein Coding	Q15413	48	GC15P033310	0.451543
SLC35C1	Solute Carrier Family 35 Member C1	Protein Coding	Q96A29	48	GC11P046825	0.451543
SLC4A5	Solute Carrier Family 4 Member 5	Protein Coding	Q9BY07	48	GC02M074217	0.451543
SLC7A14	Solute Carrier Family 7 Member 14	Protein Coding	Q8TBB6	48	GC03M170459	0.451543
SLC7A6	Solute Carrier Family 7 Member 6	Protein Coding	Q92536	48	GC16P068654	0.451543
SLC7A8	Solute Carrier Family 7 Member 8	Protein Coding	Q9UHI5	48	GC14M023125	0.451543
SOX11	SRY-Box Transcription Factor 11	Protein Coding	P35716	48	GC02P005707	0.451543
STX5	Syntaxin 5	Protein Coding	Q13190	48	GC11M062806	0.451543
UBA5	Ubiquitin Like Modifier Activating Enzyme 5	Protein Coding	Q9GZZ9	48	GC03P132654	0.451543
UFM1	Ubiquitin Fold Modifier 1	Protein Coding	P61960	48	GC13P038349	0.451543
ZMPSTE24	Zinc Metallopeptidase STE24	Protein Coding	O75844	48	GC01P040258	0.451543
ALG11	ALG11 Alpha-1,2-Mannosyltransferase	Protein Coding	Q2TAA5	47	GC13P052012	0.451543
ALG6	ALG6 Alpha-1,3-Glucosyltransferase	Protein Coding	Q9Y672	47	GC01P063367	0.451543
CIDEC	Cell Death Inducing DFFA Like Effector C	Protein Coding	Q96AQ7	47	GC03M009866	0.451543
CNTN4	Contactin 4	Protein Coding	Q8IWV2	47	GC03P002117	0.451543
IFT172	Intraflagellar Transport 172	Protein Coding	Q9UG01	47	GC02M028510	0.451543
LHX1	LIM Homeobox 1	Protein Coding	P48742	47	GC17P077600	0.451543
ACTN3	Actinin Alpha 3	Protein Coding	Q08043	46	GC11P066546	0.451543
CCT6B	Chaperonin Containing TCP1 Subunit 6B	Protein Coding	Q92526	46	GC17M034927	0.451543
FCRL5	Fc Receptor Like 5	Protein Coding	Q96RD9	46	GC01M157514	0.451543
FIP1L1	Factor Interacting With PAPOLA And CPSF1	Protein Coding	Q6UN15	46	GC04P053447	0.451543
GPR161	G Protein-Coupled Receptor 161	Protein Coding	Q8N6U8	46	GC01M168080	0.451543
GTF2H4	General Transcription Factor IIH Subunit 4	Protein Coding	Q92759	46	GC06P104082	0.451543
GTF2H5	General Transcription Factor IIH Subunit 5	Protein Coding	Q6ZYL4	46	GC06P158168	0.451543
ID3	Inhibitor Of DNA Binding 3	Protein Coding	Q02535	46	GC01M023557	0.451543
IFNA1	Interferon Alpha 1	Protein Coding	P01562	46	GC09P021647	0.451543
IQSEC2	IQ Motif And Sec7 Domain ArfGEF 2	Protein Coding	Q5JU85	46	GC0XM053225	0.451543
MMAA	Metabolism Of Cobalamin Associated A	Protein Coding	Q8IVH4	46	GC04P145620	0.451543
MNDA	Myeloid Cell Nuclear Differentiation Antigen	Protein Coding	P41218	46	GC01P158801	0.451543
MPP1	MAGUK P55 Scaffold Protein 1	Protein Coding	Q00013	46	GC0XM154779	0.451543
MYBL1	MYB Proto-Oncogene Like 1	Protein Coding	P10243	46	GC08M066562	0.451543
NHLRC1	NHL Repeat Containing E3 Ubiquitin Protein Ligase 1	Protein Coding	Q6VVB1	46	GC06M018120	0.451543
NSFL1C	NSFL1 Cofactor	Protein Coding	Q9UNZ2	46	GC20M001442	0.451543
POLR2L	RNA Polymerase II, I And III Subunit L	Protein Coding	P62875	46	GC11M007974	0.451543
RFX3	Regulatory Factor X3	Protein Coding	P48380	46	GC09M003214	0.451543
SLC9A7	Solute Carrier Family 9 Member A7	Protein Coding	Q96T83	46	GC0XM046599	0.451543
SSBP3	Single Stranded DNA Binding Protein 3	Protein Coding	Q9BWW4	46	GC01M054225	0.451543
CXCL9	C-X-C Motif Chemokine Ligand 9	Protein Coding	Q07325	45	GC04M076001	0.451543
DNAH8	Dynein Axonemal Heavy Chain 8	Protein Coding	Q96JB1	45	GC06P104260	0.451543
GLIS3	GLIS Family Zinc Finger 3	Protein Coding	Q8NEA6	45	GC09M003816	0.451543
GTF2H3	General Transcription Factor IIH Subunit 3	Protein Coding	Q13889	45	GC12P123633	0.451543
H3C1	H3 Clustered Histone 1	Protein Coding	P68431	45	GC06P103886	0.451543
IFT27	Intraflagellar Transport 27	Protein Coding	Q9BW83	45	GC22M068163	0.451543
IFT74	Intraflagellar Transport 74	Protein Coding	Q96LB3	45	GC09P026947	0.451543
KCNJ16	Potassium Inwardly Rectifying Channel Subfamily J Member 16	Protein Coding	Q9NPI9	45	GC17P070053	0.451543
NEIL1	Nei Like DNA Glycosylase 1	Protein Coding	Q96FI4	45	GC15P075346	0.451543
PKHD1	PKHD1 Ciliary IPT Domain Containing Fibrocystin/Polyductin	Protein Coding	P08F94	45	GC06M081254	0.451543
RFX1	Regulatory Factor X1	Protein Coding	P22670	45	GC19M013961	0.451543
RFX6	Regulatory Factor X6	Protein Coding	Q8HWS3	45	GC06P116877	0.451543
SLC44A3	Solute Carrier Family 44 Member 3	Protein Coding	Q8N4M1	45	GC01P094820	0.451543
SLC7A10	Solute Carrier Family 7 Member 10	Protein Coding	Q9NS82	45	GC19M033208	0.451543
TFDP2	Transcription Factor Dp-2	Protein Coding	Q14188	45	GC03M141944	0.451543
XAB2	XPA Binding Protein 2	Protein Coding	Q9HCS7	45	GC19M007619	0.451543
ANKK1	Ankyrin Repeat And Kinase Domain Containing 1	Protein Coding	Q8NFD2	44	GC11P113387	0.451543
CAMKMT	Calmodulin-Lysine N-Methyltransferase	Protein Coding	Q7Z624	44	GC02P044361	0.451543
CDK5RAP3	CDK5 Regulatory Subunit Associated Protein 3	Protein Coding	Q96JB5	44	GC17P047967	0.451543
DDRGK1	DDRGK Domain Containing 1	Protein Coding	Q96HY6	44	GC20M003781	0.451543
EXOSC4	Exosome Component 4	Protein Coding	Q9NPD3	44	GC08P145574	0.451543
KLF11	KLF Transcription Factor 11	Protein Coding	O14901	44	GC02P010045	0.451543
POLR2I	RNA Polymerase II Subunit I	Protein Coding	P36954	44	GC19M036113	0.451543
RILPL1	Rab Interacting Lysosomal Protein Like 1	Protein Coding	Q5EBL4	44	GC12M123470	0.451543
RNF25	Ring Finger Protein 25	Protein Coding	Q96BH1	44	GC02M218663	0.451543
SNAPIN	SNAP Associated Protein	Protein Coding	O95295	44	GC01P154843	0.451543
TCEA1	Transcription Elongation Factor A1	Protein Coding	P23193	44	GC08M053966	0.451543
TCEA3	Transcription Elongation Factor A3	Protein Coding	O75764	44	GC01M023382	0.451543
UFC1	Ubiquitin-Fold Modifier Conjugating Enzyme 1	Protein Coding	Q9Y3C8	44	GC01P161152	0.451543
UFL1	UFM1 Specific Ligase 1	Protein Coding	O94874	44	GC06P096521	0.451543
UVSSA	UV Stimulated Scaffold Protein A	Protein Coding	Q2YD98	44	GC04P001853	0.451543
BDH2	3-Hydroxybutyrate Dehydrogenase 2	Protein Coding	Q9BUT1	43	GC04M103077	0.451543
CSH1	Chorionic Somatomammotropin Hormone 1	Protein Coding	P0DML2	43	GC17M063894	0.451543
GTF2H2	General Transcription Factor IIH Subunit 2	Protein Coding	Q13888	43	GC05M075655	0.451543
KIF12	Kinesin Family Member 12	Protein Coding	Q96FN5	43	GC09M114086	0.451543
P3H3	Prolyl 3-Hydroxylase 3	Protein Coding	Q8IVL6	43	GC12P028193	0.451543
RHBDL2	Rhomboid Like 2	Protein Coding	Q9NX52	43	GC01M038885	0.451543
TCEA2	Transcription Elongation Factor A2	Protein Coding	Q15560	43	GC20P064049	0.451543
ZNHIT3	Zinc Finger HIT-Type Containing 3	Protein Coding	Q15649	43	GC17P036486	0.451543
CCDC86	Coiled-Coil Domain Containing 86	Protein Coding	Q9H6F5	42	GC11P061094	0.451543
CEP192	Centrosomal Protein 192	Protein Coding	Q8TEP8	42	GC18P019359	0.451543
FSIP1	Fibrous Sheath Interacting Protein 1	Protein Coding	Q8NA03	42	GC15M039594	0.451543
H4C1	H4 Clustered Histone 1	Protein Coding	P62805	42	GC06P103887	0.451543
RPP14	Ribonuclease P/MRP Subunit P14	Protein Coding	O95059	42	GC03P058295	0.451543
SYNRG	Synergin Gamma	Protein Coding	Q9UMZ2	42	GC17M037514	0.451543
ZFAND4	Zinc Finger AN1-Type Containing 4	Protein Coding	Q86XD8	42	GC10M045615	0.451543
CEP19	Centrosomal Protein 19	Protein Coding	Q96LK0	41	GC03M196706	0.451543
CEP89	Centrosomal Protein 89	Protein Coding	Q96ST8	41	GC19M079442	0.451543
H2AC4	H2A Clustered Histone 4	Protein Coding	P04908	41	GC06M026105	0.451543
H2BC3	H2B Clustered Histone 3	Protein Coding	P33778	41	GC06M080532	0.451543
IFT25	Intraflagellar Transport 25	Protein Coding	Q9Y547	41	GC01M053916	0.451543
BLOC1S4	Biogenesis Of Lysosomal Organelles Complex 1 Subunit 4	Protein Coding	Q9NUP1	40	GC04P006718	0.451543
PRKRIP1	PRKR Interacting Protein 1	Protein Coding	Q9H875	40	GC07P103457	0.451543
ZNF546	Zinc Finger Protein 546	Protein Coding	Q86UE3	40	GC19P039984	0.451543
CSRNP3	Cysteine And Serine Rich Nuclear Protein 3	Protein Coding	Q8WYN3	39	GC02P165469	0.451543
RABL2A	RAB, Member Of RAS Oncogene Family Like 2A	Protein Coding	Q9UBK7	39	GC02P113627	0.451543
TIGD4	Tigger Transposable Element Derived 4	Protein Coding	Q8IY51	39	GC04M152769	0.451543
C16orf54	Chromosome 16 Open Reading Frame 54	Protein Coding	Q6UWD8	38	GC16M040807	0.451543
CSH2	Chorionic Somatomammotropin Hormone 2	Protein Coding	P0DML3	38	GC17M063872	0.451543
GGNBP2	Gametogenetin Binding Protein 2	Protein Coding	Q9H3C7	38	GC17P036544	0.451543
LRRC66	Leucine Rich Repeat Containing 66	Protein Coding	Q68CR7	38	GC04M051993	0.451543
SLC7A13	Solute Carrier Family 7 Member 13	Protein Coding	Q8TCU3	38	GC08M086214	0.451543
ZNF417	Zinc Finger Protein 417	Protein Coding	Q8TAU3	38	GC19M080265	0.451543
OR1E2	Olfactory Receptor Family 1 Subfamily E Member 2	Protein Coding	P47887	37	GC17M003432	0.451543
ZNF780B	Zinc Finger Protein 780B	Protein Coding	Q9Y6R6	37	GC19M079554	0.451543
PIFO	Primary Cilia Formation	Protein Coding	Q8TCI5	35	GC01P111324	0.451543
C16orf92	Chromosome 16 Open Reading Frame 92	Protein Coding	Q96LL3	34	GC16P047709	0.451543
C17orf78	Chromosome 17 Open Reading Frame 78	Protein Coding	Q8N4C9	34	GC17P037375	0.451543
PGBD3	PiggyBac Transposable Element Derived 3	Protein Coding	Q8N328	33	GC10M049517	0.451543
DNAH10OS	Dynein Axonemal Heavy Chain 10 Opposite Strand	RNA Gene	P0CZ25	25	GC12M123927	0.451543
MIR155HG	MIR155 Host Gene	RNA Gene		25	GC21P025609	0.451543
MIR9-1	MicroRNA 9-1	RNA Gene		23	GC01M156420	0.451543
MIR148A	MicroRNA 148a	RNA Gene		22	GC07M025950	0.451543
MIR23B	MicroRNA 23b	RNA Gene		22	GC09P095085	0.451543
CDIPTOSP	CDIP Transferase Opposite Strand, Pseudogene	RNA Gene	P0DO92	20	GC16P047700	0.451543
MIR1207	MicroRNA 1207	RNA Gene		19	GC08P128049	0.451543
ALMS1P1	ALMS1 Pseudogene 1	Pseudogene		18	GC02P073644	0.451543
BIVM-ERCC5	BIVM-ERCC5 Readthrough	Protein Coding		18	GC13P102821	0.451543
MIR3157	MicroRNA 3157	RNA Gene		16	GC10M096064	0.451543
MIR3680-1	MicroRNA 3680-1	RNA Gene		12	GC16M021506	0.451543
IGHV4-38-2	Immunoglobulin Heavy Variable 4-38-2	Protein Coding	P0DP08	9	GC14U901616	0.451543
TRD-GTC9-1	TRNA-Asp (Anticodon GTC) 9-1	RNA Gene		8	GC01P161972	0.451543
LOC126860933	BRD4-Independent Group 4 Enhancer GRCh37_chr10:50679962-50681161	Functional Element		4	GC10P049471	0.451543
LOC126861834	BRD4-Independent Group 4 Enhancer GRCh37_chr13:103518038-103519237	Functional Element		4	GC13P102865	0.451543
LOC113939916	Sharpr-MPRA Regulatory Region 3429	Functional Element		3	GC10P049606	0.451543
DEL2P21	Hypotonia-Cystinuria Syndrome	Genetic Locus		2	GC02U901740	0.451543
COMT	Catechol-O-Methyltransferase	Protein Coding	P21964	58	GC22P019941	0.423998
MMP3	Matrix Metallopeptidase 3	Protein Coding	P08254	56	GC11M102835	0.423998
CCL5	C-C Motif Chemokine Ligand 5	Protein Coding	P13501	50	GC17M035871	0.423998
CYBA	Cytochrome B-245 Alpha Chain	Protein Coding	P13498	54	GC16M088643	0.387055
KDR	Kinase Insert Domain Receptor	Protein Coding	P35968	60	GC04M055078	0.374901
RELA	RELA Proto-Oncogene, NF-KB Subunit	Protein Coding	Q04206	58	GC11M065653	0.374901
ALDOA	Aldolase, Fructose-Bisphosphate A	Protein Coding	P04075	55	GC16P030064	0.374901
AKR1B1	Aldo-Keto Reductase Family 1 Member B	Protein Coding	P15121	53	GC07M134442	0.374901
VCAM1	Vascular Cell Adhesion Molecule 1	Protein Coding	P19320	53	GC01P100719	0.374901
SOCS3	Suppressor Of Cytokine Signaling 3	Protein Coding	O14543	50	GC17M078356	0.374901
FFAR2	Free Fatty Acid Receptor 2	Protein Coding	O15552	48	GC19P083149	0.374901
PECAM1	Platelet And Endothelial Cell Adhesion Molecule 1	Protein Coding	P16284	48	GC17M064319	0.374901
AKT1S1	AKT1 Substrate 1	Protein Coding	Q96B36	46	GC19M049869	0.374901
GP2	Glycoprotein 2	Protein Coding	P55259	46	GC16M020309	0.374901
LPA	Lipoprotein(A)	Protein Coding	P08519	46	GC06M160531	0.374901
UTS2	Urotensin 2	Protein Coding	O95399	45	GC01M007843	0.374901
SLC17A2	Solute Carrier Family 17 Member 2	Protein Coding	O00624	44	GC06M025912	0.374901
H19	H19 Imprinted Maternally Expressed Transcript	RNA Gene		30	GC11M001995	0.374901
PCAT1	Prostate Cancer Associated Transcript 1	RNA Gene		20	GC08P126553	0.374901
CCR2	C-C Motif Chemokine Receptor 2	Protein Coding	P41597	51	GC03P051152	0.346193
GJA4	Gap Junction Protein Alpha 4	Protein Coding	P35212	49	GC01P034792	0.346193
AGTR1	Angiotensin II Receptor Type 1	Protein Coding	P30556	58	GC03P148697	0.299812
GAPDH	Glyceraldehyde-3-Phosphate Dehydrogenase	Protein Coding	P04406	57	GC12P028185	0.299812
PON1	Paraoxonase 1	Protein Coding	P27169	54	GC07M095297	0.299812
ADM	Adrenomedullin	Protein Coding	P35318	52	GC11P010304	0.299812
SLC17A5	Solute Carrier Family 17 Member 5	Protein Coding	Q9NRA2	51	GC06M073593	0.299812
CLCNKB	Chloride Voltage-Gated Channel Kb	Protein Coding	P51801	50	GC01P016101	0.299812
PUS7	Pseudouridine Synthase 7	Protein Coding	Q96PZ0	47	GC07M105439	0.299812
HBG1	Hemoglobin Subunit Gamma 1	Protein Coding	P69891	46	GC11M008314	0.299812
ZNF365	Zinc Finger Protein 365	Protein Coding	Q70YC4	44	GC10P062374	0.299812
URAD	Ureidoimidazoline (2-Oxo-4-Hydroxy-4-Carboxy-5-) Decarboxylase	Protein Coding	A6NGE7	32	GC13M027978	0.299812
MT-TP	Mitochondrially Encoded TRNA-Pro (CCN)	RNA Gene		12	GCMTM015957	0.299812
TRA-TGC7-1	TRNA-Ala (Anticodon TGC) 7-1	RNA Gene		10	GC06M080743	0.299812
TRA-TGC5-1	TRNA-Ala (Anticodon TGC) 5-1	RNA Gene		9	GC06M028817	0.299812
PLA2G7	Phospholipase A2 Group VII	Protein Coding	Q13093	57	GC06M046704	0.244795
HLA-DRB1	Major Histocompatibility Complex, Class II, DR Beta 1	Protein Coding	P01911	54	GC06M080969	0.244795
HLA-A	Major Histocompatibility Complex, Class I, A	Protein Coding	P04439	53	GC06P104057	0.244795
SLC26A3	Solute Carrier Family 26 Member 3	Protein Coding	P40879	53	GC07M107765	0.244795
TET2	Tet Methylcytosine Dioxygenase 2	Protein Coding	Q6N021	53	GC04P105145	0.244795
MAF	MAF BZIP Transcription Factor	Protein Coding	O75444	52	GC16M079204	0.244795
ARID1B	AT-Rich Interaction Domain 1B	Protein Coding	Q8NFD5	51	GC06P156777	0.244795
ITM2B	Integral Membrane Protein 2B	Protein Coding	Q9Y287	51	GC13P048233	0.244795
APOA5	Apolipoprotein A5	Protein Coding	Q6Q788	50	GC11M116789	0.244795
CST3	Cystatin C	Protein Coding	P01034	50	GC20M023781	0.244795
HLA-C	Major Histocompatibility Complex, Class I, C	Protein Coding	P10321	50	GC06M080880	0.244795
ZBTB20	Zinc Finger And BTB Domain Containing 20	Protein Coding	Q9HC78	48	GC03M114315	0.244795
IL37	Interleukin 37	Protein Coding	Q9NZH6	45	GC02P125992	0.244795
SCGN	Secretagogin, EF-Hand Calcium Binding Protein	Protein Coding	O76038	44	GC06P025652	0.244795
VSTM4	V-Set And Transmembrane Domain Containing 4	Protein Coding	Q8IW00	41	GC10M049014	0.244795
EMC4	ER Membrane Protein Complex Subunit 4	Protein Coding	Q5J8M3	40	GC15P053570	0.244795
MIR203A	MicroRNA 203a	RNA Gene		24	GC14P112094	0.244795
MIR320A	MicroRNA 320a	RNA Gene		24	GC08M022288	0.244795
RNU4ATAC	RNA, U4atac Small Nuclear	RNA Gene		23	GC02P126104	0.244795
MIR519C	MicroRNA 519c	RNA Gene		18	GC19P053686	0.244795
ITGB3	Integrin Subunit Beta 3	Protein Coding	P05106	59	GC17P078453	0.173096
ITGB2	Integrin Subunit Beta 2	Protein Coding	P05107	57	GC21M044885	0.173096
KRT18	Keratin 18	Protein Coding	P05783	57	GC12P052948	0.173096
RXRA	Retinoid X Receptor Alpha	Protein Coding	P19793	56	GC09P134317	0.173096
SLC12A2	Solute Carrier Family 12 Member 2	Protein Coding	P55011	56	GC05P128083	0.173096
CP	Ceruloplasmin	Protein Coding	P00450	55	GC03M149162	0.173096
TAP1	Transporter 1, ATP Binding Cassette Subfamily B Member	Protein Coding	Q03518	55	GC06M080986	0.173096
ABCC2	ATP Binding Cassette Subfamily C Member 2	Protein Coding	Q92887	54	GC10P099782	0.173096
FBN1	Fibrillin 1	Protein Coding	P35555	54	GC15M048408	0.173096
IRS1	Insulin Receptor Substrate 1	Protein Coding	P35568	54	GC02M226731	0.173096
NPR1	Natriuretic Peptide Receptor 1	Protein Coding	P16066	54	GC01P154852	0.173096
PDCD1	Programmed Cell Death 1	Protein Coding	Q15116	54	GC02M241849	0.173096
PLA2G4A	Phospholipase A2 Group IVA	Protein Coding	P47712	54	GC01P186798	0.173096
TSHR	Thyroid Stimulating Hormone Receptor	Protein Coding	P16473	54	GC14P080954	0.173096
HMGCR	3-Hydroxy-3-Methylglutaryl-CoA Reductase	Protein Coding	P04035	53	GC05P075336	0.173096
IRF5	Interferon Regulatory Factor 5	Protein Coding	Q13568	53	GC07P128937	0.173096
ITGA2	Integrin Subunit Alpha 2	Protein Coding	P17301	53	GC05P052989	0.173096
PCK2	Phosphoenolpyruvate Carboxykinase 2, Mitochondrial	Protein Coding	Q16822	53	GC14P024094	0.173096
SLC2A4	Solute Carrier Family 2 Member 4	Protein Coding	P14672	53	GC17P012995	0.173096
FGF23	Fibroblast Growth Factor 23	Protein Coding	Q9GZV9	52	GC12M004368	0.173096
IL12B	Interleukin 12B	Protein Coding	P29460	52	GC05M159314	0.173096
NR5A2	Nuclear Receptor Subfamily 5 Group A Member 2	Protein Coding	O00482	51	GC01P199996	0.173096
PPARA	Peroxisome Proliferator Activated Receptor Alpha	Protein Coding	Q07869	51	GC22P046150	0.173096
RELN	Reelin	Protein Coding	P78509	51	GC07M103471	0.173096
ST6GAL1	ST6 Beta-Galactoside Alpha-2,6-Sialyltransferase 1	Protein Coding	P15907	51	GC03P186930	0.173096
THPO	Thrombopoietin	Protein Coding	P40225	50	GC03M184371	0.173096
ADH7	Alcohol Dehydrogenase 7 (Class IV), Mu Or Sigma Polypeptide	Protein Coding	P40394	49	GC04M099412	0.173096
FADS1	Fatty Acid Desaturase 1	Protein Coding	O60427	49	GC11M061799	0.173096
RETN	Resistin	Protein Coding	Q9HD89	49	GC19P007669	0.173096
SPTB	Spectrin Beta, Erythrocytic	Protein Coding	P11277	49	GC14M064746	0.173096
THBS4	Thrombospondin 4	Protein Coding	P35443	49	GC05P079991	0.173096
CABIN1	Calcineurin Binding Protein 1	Protein Coding	Q9Y6J0	48	GC22P024011	0.173096
CD160	CD160 Molecule	Protein Coding	O95971	48	GC01P145719	0.173096
CDKN3	Cyclin Dependent Kinase Inhibitor 3	Protein Coding	Q16667	48	GC14P054398	0.173096
ECI2	Enoyl-CoA Delta Isomerase 2	Protein Coding	O75521	48	GC06M004115	0.173096
KIF3A	Kinesin Family Member 3A	Protein Coding	Q9Y496	48	GC05M132689	0.173096
KTN1	Kinectin 1	Protein Coding	Q86UP2	48	GC14P055559	0.173096
PNPLA3	Patatin Like Phospholipase Domain Containing 3	Protein Coding	Q9NST1	48	GC22P043923	0.173096
SHBG	Sex Hormone Binding Globulin	Protein Coding	P04278	48	GC17P007613	0.173096
SLC23A1	Solute Carrier Family 23 Member 1	Protein Coding	Q9UHI7	48	GC05M139367	0.173096
CDH10	Cadherin 10	Protein Coding	Q9Y6N8	47	GC05M024522	0.173096
DECR1	2,4-Dienoyl-CoA Reductase 1	Protein Coding	Q16698	47	GC08P090001	0.173096
DCDC2	Doublecortin Domain Containing 2	Protein Coding	Q9UHG0	46	GC06M024171	0.173096
LGALS9	Galectin 9	Protein Coding	O00182	46	GC17P027629	0.173096
RARRES2	Retinoic Acid Receptor Responder 2	Protein Coding	Q99969	46	GC07M150333	0.173096
VPS45	Vacuolar Protein Sorting 45 Homolog	Protein Coding	Q9NRW7	46	GC01P154236	0.173096
BCAS3	BCAS3 Microtubule Associated Cell Migration Factor	Protein Coding	Q9H6U6	45	GC17P078824	0.173096
IL23A	Interleukin 23 Subunit Alpha	Protein Coding	Q9NPF7	45	GC12P058135	0.173096
SAA1	Serum Amyloid A1	Protein Coding	P0DJI8	45	GC11P018810	0.173096
KLHL5	Kelch Like Family Member 5	Protein Coding	Q96PQ7	44	GC04P039044	0.173096
MYO18B	Myosin XVIIIB	Protein Coding	Q8IUG5	44	GC22P025742	0.173096
PGA5	Pepsinogen A5	Protein Coding	P0DJD9	43	GC11P061241	0.173096
IFNL3	Interferon Lambda 3	Protein Coding	Q8IZI9	42	GC19M039243	0.173096
PRPSAP1	Phosphoribosyl Pyrophosphate Synthetase Associated Protein 1	Protein Coding	Q14558	42	GC17M076309	0.173096
PGA3	Pepsinogen A3	Protein Coding	P0DJD8	40	GC11P061203	0.173096
FABP12	Fatty Acid Binding Protein 12	Protein Coding	A6NFH5	38	GC08M081524	0.173096
PGA4	Pepsinogen A4	Protein Coding	P0DJD7	34	GC11P061222	0.173096
MALAT1	Metastasis Associated Lung Adenocarcinoma Transcript 1	RNA Gene		27	GC11P072906	0.173096
MIR146B	MicroRNA 146b	RNA Gene		24	GC10P102436	0.173096
MIR22	MicroRNA 22	RNA Gene		24	GC17M001713	0.173096
MIR34C	MicroRNA 34c	RNA Gene		24	GC11P112126	0.173096
MIR205	MicroRNA 205	RNA Gene		22	GC01P209432	0.173096
SNHG16	Small Nucleolar RNA Host Gene 16	RNA Gene		22	GC17P076544	0.173096
MIR424	MicroRNA 424	RNA Gene		21	GC0XM134728	0.173096
MIR190B	MicroRNA 190b	RNA Gene		20	GC01M154193	0.173096
MIR450B	MicroRNA 450b	RNA Gene		20	GC0XM134540	0.173096
MIR451A	MicroRNA 451a	RNA Gene		20	GC17M028861	0.173096
MIR323B	MicroRNA 323b	RNA Gene		19	GC14P112731	0.173096
SNORD15A	Small Nucleolar RNA, C/D Box 15A	RNA Gene		19	GC11P075400	0.173096
TET2-AS1	TET2 Antisense RNA 1	RNA Gene		18	GC04M105171	0.173096
CHASERR	CHD2 Adjacent Suppressive Regulatory RNA	RNA Gene		17	GC15P133448	0.173096
PWAR1	Prader Willi/Angelman Region RNA 1	RNA Gene		17	GC15P025135	0.173096
MT-TK	Mitochondrially Encoded TRNA-Lys (AAA/G)	RNA Gene		16	GCMTP008297	0.173096
URAHP	Urate (Hydroxyiso-) Hydrolase, Pseudogene	Pseudogene		13	GC16M090039	0.173096
ISCA1P1	Iron-Sulfur Cluster Assembly 1 Pseudogene 1	Pseudogene		12	GC05M062775	0.173096
ASS1P7	Argininosuccinate Synthetase 1 Pseudogene 7	Pseudogene		11	GC03M177296	0.173096
LOC126806970	CDK7 Strongly-Dependent Group 2 Enhancer GRCh37_chr4:9945957-9947156	Functional Element		2	GC04P009944	0.173096
HPRT1
HPRT
