# Supplementary material
Source: Royal Society of Chemistry journal article supplement (doi:10.1039/d5fo05398f)
Supplement: d5fo05398f4.xlsx [file d5fo05398f4.xlsx]

## Sheet: Sheet1
Table S3. Common targets between LLL flavonoids and HUA
Gene name	Uniprot ID
AKR1B1	P15121
MMP3	P08254
ESR1	P03372
PNP	P00491
SLC28A2	O43868
LGALS9	O00182
ADK	P55263
SHBG	P04278
CDK4	P11802
PTGS2	P35354
CDK1	P06493
PLAT	Q9NWW9
MAOA	P21397
XDH	P47989
IGF1R	P08069
MPO	P05164
PYGL	P06737
KDR	P35968
ABCC1	P33527
ALK	Q9UM73
ABCG2	Q9UNQ0
SYK	P43405
PIK3CG	P48736
APEX1	P27695
SLC22A12	Q96S37
CDK6	Q00534
PARP1	P09874
TTR	P02766
CD38	P28907
ADRA2A	P08913
TNF	Q9UNG2
