# Supplementary material
Source: Royal Society of Chemistry journal article supplement (doi:10.1039/d5fo05398f)
Supplement: d5fo05398f5.xlsx [file d5fo05398f5.xlsx]

## Sheet: BP
Table S4. Gene Ontology (GO) enrichment analysis (BP)
Category	Term	Count	%	PValue	Genes	List Total	Pop Hits	Pop Total	Fold Enrichment	Bonferroni	Benjamini	FDR
GOTERM_BP_DIRECT	GO:0009410~response to xenobiotic stimulus	9	29.0323	2.50238e-09	SLC22A12, ABCC1, PNP, CDK4, APEX1, CDK1, CD38, PTGS2, TNF	30	252	19357	23.044	2.02693e-06	2.02693e-06	1.93935e-06
GOTERM_BP_DIRECT	GO:1904646~cellular response to beta-amyloid	4	12.9032	4.39471e-05	ABCC1, PARP1, TNF, IGF1R	30	46	19357	56.1072	0.0349718	0.0165998	0.0158825
GOTERM_BP_DIRECT	GO:0010629~negative regulation of gene expression	6	19.3548	8.70067e-05	CDK1, KDR, LGALS9, ESR1, TNF, XDH	30	309	19357	12.5288	0.0680522	0.0165998	0.0158825
GOTERM_BP_DIRECT	GO:0043410~positive regulation of MAPK cascade	5	16.129	9.53626e-05	ALK, KDR, TNF, ADRA2A, IGF1R	30	162	19357	19.9146	0.0743391	0.0165998	0.0158825
GOTERM_BP_DIRECT	GO:0043066~negative regulation of apoptotic process	7	22.5806	0.000102468	CDK1, KDR, AKR1B1, CD38, MPO, TNF, IGF1R	30	520	19357	8.68583	0.079652	0.0165998	0.0158825
GOTERM_BP_DIRECT	GO:0050995~negative regulation of lipid catabolic process	3	9.67742	0.000290659	ALK, TNF, ADRA2A	30	17	19357	113.865	0.209799	0.0392389	0.0375434
GOTERM_BP_DIRECT	GO:0038083~peptidyl-tyrosine autophosphorylation	3	9.67742	0.000491404	ALK, KDR, IGF1R	30	22	19357	87.9864	0.328429	0.0568625	0.0544055
GOTERM_BP_DIRECT	GO:0007169~transmembrane receptor protein tyrosine kinase signaling pathway	4	12.9032	0.00101673	ALK, SYK, KDR, IGF1R	30	133	19357	19.4055	0.561313	0.102944	0.0984956
GOTERM_BP_DIRECT	GO:0007568~aging	4	12.9032	0.00149325	APEX1, PTGS2, MPO, IGF1R	30	152	19357	16.9798	0.701934	0.134393	0.128586
GOTERM_BP_DIRECT	GO:0045429~positive regulation of nitric oxide biosynthetic process	3	9.67742	0.00215324	PTGS2, ESR1, TNF	30	46	19357	42.0804	0.825531	0.14598	0.139672
GOTERM_BP_DIRECT	GO:0046777~protein autophosphorylation	4	12.9032	0.00238068	ALK, SYK, KDR, IGF1R	30	179	19357	14.4186	0.854946	0.14598	0.139672
GOTERM_BP_DIRECT	GO:0031334~positive regulation of protein complex assembly	3	9.67742	0.0029551	SYK, MMP3, TNF	30	54	19357	35.8463	0.909025	0.14598	0.139672
GOTERM_BP_DIRECT	GO:0006148~inosine catabolic process	2	6.45161	0.00299416	PNP, XDH	30	2	19357	645.233	0.911867	0.14598	0.139672
GOTERM_BP_DIRECT	GO:0006149~deoxyinosine catabolic process	2	6.45161	0.00299416	PNP, XDH	30	2	19357	645.233	0.911867	0.14598	0.139672
GOTERM_BP_DIRECT	GO:1990268~response to gold nanoparticle	2	6.45161	0.00299416	MPO, TNF	30	2	19357	645.233	0.911867	0.14598	0.139672
GOTERM_BP_DIRECT	GO:0070371~ERK1 and ERK2 cascade	3	9.67742	0.00306377	CDK1, KDR, LGALS9	30	55	19357	35.1945	0.916713	0.14598	0.139672
GOTERM_BP_DIRECT	GO:0048146~positive regulation of fibroblast proliferation	3	9.67742	0.00306377	CDK6, CDK4, ESR1	30	55	19357	35.1945	0.916713	0.14598	0.139672
GOTERM_BP_DIRECT	GO:0048661~positive regulation of smooth muscle cell proliferation	3	9.67742	0.00340091	PTGS2, TNF, IGF1R	30	58	19357	33.3741	0.936672	0.153041	0.146428
GOTERM_BP_DIRECT	GO:0032757~positive regulation of interleukin-8 production	3	9.67742	0.00425178	SYK, LGALS9, TNF	30	65	19357	29.78	0.968295	0.158056	0.151226
GOTERM_BP_DIRECT	GO:0001819~positive regulation of cytokine production	3	9.67742	0.00438059	TNF, ADRA2A, PIK3CG	30	66	19357	29.3288	0.971449	0.158056	0.151226
GOTERM_BP_DIRECT	GO:0006157~deoxyadenosine catabolic process	2	6.45161	0.004488	PNP, XDH	30	3	19357	430.156	0.973838	0.158056	0.151226
GOTERM_BP_DIRECT	GO:0002679~respiratory burst involved in defense response	2	6.45161	0.004488	MPO, PIK3CG	30	3	19357	430.156	0.973838	0.158056	0.151226
GOTERM_BP_DIRECT	GO:0097744~urate salt excretion	2	6.45161	0.004488	SLC22A12, ABCG2	30	3	19357	430.156	0.973838	0.158056	0.151226
GOTERM_BP_DIRECT	GO:0033674~positive regulation of kinase activity	3	9.67742	0.00505152	ALK, KDR, IGF1R	30	71	19357	27.2634	0.983462	0.170489	0.163122
GOTERM_BP_DIRECT	GO:0006468~protein phosphorylation	5	16.129	0.00579043	CDK6, SYK, CDK4, CDK1, PIK3CG	30	489	19357	6.59748	0.99094	0.172983	0.165509
GOTERM_BP_DIRECT	GO:0001525~angiogenesis	4	12.9032	0.00587033	SYK, KDR, PTGS2, PIK3CG	30	247	19357	10.4491	0.991511	0.172983	0.165509
GOTERM_BP_DIRECT	GO:0043406~positive regulation of MAP kinase activity	3	9.67742	0.00591506	TNF, ADRA2A, PIK3CG	30	77	19357	25.139	0.991815	0.172983	0.165509
GOTERM_BP_DIRECT	GO:0046059~dAMP catabolic process	2	6.45161	0.00597967	PNP, XDH	30	4	19357	322.617	0.992235	0.172983	0.165509
GOTERM_BP_DIRECT	GO:0007565~female pregnancy	3	9.67742	0.00684127	CD38, LGALS9, ADRA2A	30	83	19357	23.3217	0.996153	0.177942	0.170254
GOTERM_BP_DIRECT	GO:0014068~positive regulation of phosphatidylinositol 3-kinase signaling	3	9.67742	0.00716375	KDR, TNF, IGF1R	30	85	19357	22.7729	0.997043	0.177942	0.170254
GOTERM_BP_DIRECT	GO:0009750~response to fructose	2	6.45161	0.00746919	PTGS2, TNF	30	5	19357	258.093	0.997695	0.177942	0.170254
GOTERM_BP_DIRECT	GO:0006204~IMP catabolic process	2	6.45161	0.00746919	PNP, XDH	30	5	19357	258.093	0.997695	0.177942	0.170254
GOTERM_BP_DIRECT	GO:0031622~positive regulation of fever generation	2	6.45161	0.00746919	PTGS2, TNF	30	5	19357	258.093	0.997695	0.177942	0.170254
GOTERM_BP_DIRECT	GO:0043243~positive regulation of protein complex disassembly	2	6.45161	0.00746919	TNF, IGF1R	30	5	19357	258.093	0.997695	0.177942	0.170254
GOTERM_BP_DIRECT	GO:0032355~response to estradiol	3	9.67742	0.00817181	CD38, PTGS2, ESR1	30	91	19357	21.2714	0.998701	0.189119	0.180947
GOTERM_BP_DIRECT	GO:1990962~drug transport across blood-brain barrier	2	6.45161	0.00895655	ABCC1, ABCG2	30	6	19357	215.078	0.999316	0.201522	0.192815
GOTERM_BP_DIRECT	GO:0007165~signal transduction	7	22.5806	0.00974714	ALK, TTR, CDK6, CDK4, CD38, ESR1, IGF1R	30	1259	19357	3.58748	0.999642	0.206288	0.197375
GOTERM_BP_DIRECT	GO:0032869~cellular response to insulin stimulus	3	9.67742	0.00998492	SLC22A12, PARP1, CDK4	30	101	19357	19.1653	0.999705	0.206288	0.197375
GOTERM_BP_DIRECT	GO:0032755~positive regulation of interleukin-6 production	3	9.67742	0.0103671	SYK, LGALS9, TNF	30	103	19357	18.7932	0.999784	0.206288	0.197375
GOTERM_BP_DIRECT	GO:0006166~purine ribonucleoside salvage	2	6.45161	0.0104418	PNP, ADK	30	7	19357	184.352	0.999797	0.206288	0.197375
GOTERM_BP_DIRECT	GO:0006144~purine nucleobase metabolic process	2	6.45161	0.0104418	TTR, ADK	30	7	19357	184.352	0.999797	0.206288	0.197375
GOTERM_BP_DIRECT	GO:0045471~response to ethanol	3	9.67742	0.0111509	CDK1, TNF, IGF1R	30	107	19357	18.0907	0.999886	0.20998	0.200907
GOTERM_BP_DIRECT	GO:0015747~urate transport	2	6.45161	0.0119248	SLC22A12, ABCG2	30	8	19357	161.308	0.99994	0.20998	0.200907
GOTERM_BP_DIRECT	GO:0051901~positive regulation of mitochondrial depolarization	2	6.45161	0.0119248	PARP1, KDR	30	8	19357	161.308	0.99994	0.20998	0.200907
GOTERM_BP_DIRECT	GO:0071636~positive regulation of transforming growth factor beta production	2	6.45161	0.0119248	LGALS9, PTGS2	30	8	19357	161.308	0.99994	0.20998	0.200907
GOTERM_BP_DIRECT	GO:0000255~allantoin metabolic process	2	6.45161	0.0119248	PNP, XDH	30	8	19357	161.308	0.99994	0.20998	0.200907
GOTERM_BP_DIRECT	GO:0042593~glucose homeostasis	3	9.67742	0.0132208	PYGL, ADRA2A, IGF1R	30	117	19357	16.5444	0.999979	0.227847	0.218002
GOTERM_BP_DIRECT	GO:0001945~lymph vessel development	2	6.45161	0.0148845	SYK, KDR	30	10	19357	129.047	0.999995	0.231855	0.221836
GOTERM_BP_DIRECT	GO:0046415~urate metabolic process	2	6.45161	0.0148845	SLC22A12, ABCG2	30	10	19357	129.047	0.999995	0.231855	0.221836
GOTERM_BP_DIRECT	GO:0070633~transepithelial transport	2	6.45161	0.0148845	ABCC1, ABCG2	30	10	19357	129.047	0.999995	0.231855	0.221836
GOTERM_BP_DIRECT	GO:0046638~positive regulation of alpha-beta T cell differentiation	2	6.45161	0.0148845	PNP, SYK	30	10	19357	129.047	0.999995	0.231855	0.221836
GOTERM_BP_DIRECT	GO:0002070~epithelial cell maturation	2	6.45161	0.0148845	KDR, AKR1B1	30	10	19357	129.047	0.999995	0.231855	0.221836
GOTERM_BP_DIRECT	GO:0016310~phosphorylation	3	9.67742	0.0154449	ALK, ADK, PIK3CG	30	127	19357	15.2417	0.999997	0.236045	0.225845
GOTERM_BP_DIRECT	GO:0051897~positive regulation of protein kinase B signaling	3	9.67742	0.0159078	TNF, PIK3CG, IGF1R	30	129	19357	15.0054	0.999998	0.238617	0.228307
GOTERM_BP_DIRECT	GO:1903799~negative regulation of production of miRNAs involved in gene silencing by miRNA	2	6.45161	0.0163611	ESR1, TNF	30	11	19357	117.315	0.999998	0.240955	0.230543
GOTERM_BP_DIRECT	GO:0051926~negative regulation of calcium ion transport	2	6.45161	0.0178356	PTGS2, ADRA2A	30	12	19357	107.539	1	0.257979	0.246832
GOTERM_BP_DIRECT	GO:0032496~response to lipopolysaccharide	3	9.67742	0.0190599	LGALS9, PTGS2, MPO	30	142	19357	13.6317	1	0.270852	0.259148
GOTERM_BP_DIRECT	GO:0007275~multicellular organism development	3	9.67742	0.0195665	ALK, KDR, IGF1R	30	144	19357	13.4424	1	0.273257	0.261449
GOTERM_BP_DIRECT	GO:0010389~regulation of G2/M transition of mitotic cell cycle	2	6.45161	0.0207782	CDK6, CDK4	30	14	19357	92.1762	1	0.28526	0.272934
GOTERM_BP_DIRECT	GO:0007204~positive regulation of cytosolic calcium ion concentration	3	9.67742	0.0219157	CD38, ESR1, PIK3CG	30	153	19357	12.6516	1	0.290637	0.278079
GOTERM_BP_DIRECT	GO:0071639~positive regulation of monocyte chemotactic protein-1 production	2	6.45161	0.0222463	SYK, LGALS9	30	15	19357	86.0311	1	0.290637	0.278079
GOTERM_BP_DIRECT	GO:0002281~macrophage activation involved in immune response	2	6.45161	0.0222463	SYK, TNF	30	15	19357	86.0311	1	0.290637	0.278079
GOTERM_BP_DIRECT	GO:0006954~inflammatory response	4	12.9032	0.0235139	LGALS9, PTGS2, TNF, PIK3CG	30	414	19357	6.23414	1	0.301474	0.288447
GOTERM_BP_DIRECT	GO:0001666~response to hypoxia	3	9.67742	0.0238202	CD38, PLAT, TNF	30	160	19357	12.0981	1	0.301474	0.288447
GOTERM_BP_DIRECT	GO:0051092~positive regulation of NF-kappaB transcription factor activity	3	9.67742	0.0252209	ALK, LGALS9, TNF	30	165	19357	11.7315	1	0.314292	0.300711
GOTERM_BP_DIRECT	GO:0051044~positive regulation of membrane protein ectodomain proteolysis	2	6.45161	0.0266379	TNF, ADRA2A	30	18	19357	71.6926	1	0.326919	0.312793
GOTERM_BP_DIRECT	GO:0002526~acute inflammatory response	2	6.45161	0.029555	TNF, ADRA2A	30	20	19357	64.5233	1	0.352052	0.33684
GOTERM_BP_DIRECT	GO:0015711~organic anion transport	2	6.45161	0.029555	SLC22A12, ABCG2	30	20	19357	64.5233	1	0.352052	0.33684
GOTERM_BP_DIRECT	GO:0070542~response to fatty acid	2	6.45161	0.0324637	PLAT, PTGS2	30	22	19357	58.6576	1	0.381095	0.364628
GOTERM_BP_DIRECT	GO:0043303~mast cell degranulation	2	6.45161	0.0339148	SYK, PIK3CG	30	23	19357	56.1072	1	0.392443	0.375486
GOTERM_BP_DIRECT	GO:0051000~positive regulation of nitric-oxide synthase activity	2	6.45161	0.0368109	ESR1, TNF	30	25	19357	51.6187	1	0.414122	0.396228
GOTERM_BP_DIRECT	GO:0046697~decidualization	2	6.45161	0.0368109	PARP1, PTGS2	30	25	19357	51.6187	1	0.414122	0.396228
GOTERM_BP_DIRECT	GO:0006955~immune response	4	12.9032	0.0375067	PNP, TNF, PIK3CG, IGF1R	30	497	19357	5.19302	1	0.41617	0.398187
GOTERM_BP_DIRECT	GO:0032753~positive regulation of interleukin-4 production	2	6.45161	0.0396986	SYK, LGALS9	30	27	19357	47.7951	1	0.434538	0.415762
GOTERM_BP_DIRECT	GO:0010628~positive regulation of gene expression	4	12.9032	0.0406054	CDK6, CDK1, LGALS9, TNF	30	513	19357	5.03106	1	0.438458	0.419512
GOTERM_BP_DIRECT	GO:0010971~positive regulation of G2/M transition of mitotic cell cycle	2	6.45161	0.0411393	CDK4, CDK1	30	28	19357	46.0881	1	0.438458	0.419512
GOTERM_BP_DIRECT	GO:0071549~cellular response to dexamethasone stimulus	2	6.45161	0.0425779	PLAT, IGF1R	30	29	19357	44.4989	1	0.447897	0.428544
GOTERM_BP_DIRECT	GO:0070374~positive regulation of ERK1 and ERK2 cascade	3	9.67742	0.0448191	KDR, LGALS9, TNF	30	226	19357	8.56504	1	0.46017	0.440286
GOTERM_BP_DIRECT	GO:0045907~positive regulation of vasoconstriction	2	6.45161	0.0454489	CD38, PTGS2	30	31	19357	41.628	1	0.46017	0.440286
GOTERM_BP_DIRECT	GO:0010033~response to organic substance	2	6.45161	0.0454489	CDK6, CDK4	30	31	19357	41.628	1	0.46017	0.440286
GOTERM_BP_DIRECT	GO:0008284~positive regulation of cell proliferation	4	12.9032	0.0463349	CDK4, KDR, ADRA2A, IGF1R	30	541	19357	4.77067	1	0.463349	0.443328
GOTERM_BP_DIRECT	GO:0048144~fibroblast proliferation	2	6.45161	0.0497397	CDK1, ESR1	30	34	19357	37.9549	1	0.485412	0.464437
GOTERM_BP_DIRECT	GO:1900182~positive regulation of protein localization to nucleus	2	6.45161	0.0497397	PARP1, CDK1	30	34	19357	37.9549	1	0.485412	0.464437
GOTERM_BP_DIRECT	GO:0042981~regulation of apoptotic process	3	9.67742	0.0506597	ALK, APEX1, ESR1	30	242	19357	7.99876	1	0.487581	0.466513
GOTERM_BP_DIRECT	GO:0090050~positive regulation of cell migration involved in sprouting angiogenesis	2	6.45161	0.0511659	KDR, PTGS2	30	35	19357	36.8705	1	0.487581	0.466513
GOTERM_BP_DIRECT	GO:0006139~nucleobase-containing compound metabolic process	2	6.45161	0.054012	PNP, SLC28A2	30	37	19357	34.8775	1	0.504493	0.482694
GOTERM_BP_DIRECT	GO:0055085~transmembrane transport	3	9.67742	0.0548273	SLC22A12, ABCC1, ABCG2	30	253	19357	7.65099	1	0.504493	0.482694
GOTERM_BP_DIRECT	GO:0070555~response to interleukin-1	2	6.45161	0.055432	CD38, LGALS9	30	38	19357	33.9596	1	0.504493	0.482694
GOTERM_BP_DIRECT	GO:0042311~vasodilation	2	6.45161	0.055432	TNF, ADRA2A	30	38	19357	33.9596	1	0.504493	0.482694
GOTERM_BP_DIRECT	GO:0001937~negative regulation of endothelial cell proliferation	2	6.45161	0.0568499	TNF, XDH	30	39	19357	33.0889	1	0.511649	0.489541
GOTERM_BP_DIRECT	GO:0071392~cellular response to estradiol stimulus	2	6.45161	0.0582657	ESR1, IGF1R	30	40	19357	32.2617	1	0.513517	0.491328
GOTERM_BP_DIRECT	GO:0030335~positive regulation of cell migration	3	9.67742	0.0583253	KDR, ADRA2A, IGF1R	30	262	19357	7.38817	1	0.513517	0.491328
GOTERM_BP_DIRECT	GO:0032733~positive regulation of interleukin-10 production	2	6.45161	0.0610913	SYK, LGALS9	30	42	19357	30.7254	1	0.526425	0.503678
GOTERM_BP_DIRECT	GO:0042307~positive regulation of protein import into nucleus	2	6.45161	0.0610913	CDK1, PTGS2	30	42	19357	30.7254	1	0.526425	0.503678
GOTERM_BP_DIRECT	GO:0043507~positive regulation of JUN kinase activity	2	6.45161	0.062501	SYK, TNF	30	43	19357	30.0109	1	0.528224	0.5054
GOTERM_BP_DIRECT	GO:0016477~cell migration	3	9.67742	0.0635129	CDK1, KDR, PIK3CG	30	275	19357	7.03891	1	0.528224	0.5054
GOTERM_BP_DIRECT	GO:0045087~innate immune response	4	12.9032	0.0638031	SYK, PARP1, MMP3, PIK3CG	30	617	19357	4.18304	1	0.528224	0.5054
GOTERM_BP_DIRECT	GO:0032735~positive regulation of interleukin-12 production	2	6.45161	0.0639086	SYK, LGALS9	30	44	19357	29.3288	1	0.528224	0.5054
GOTERM_BP_DIRECT	GO:0014065~phosphatidylinositol 3-kinase signaling	2	6.45161	0.0653142	PIK3CG, IGF1R	30	45	19357	28.677	1	0.529045	0.506185
GOTERM_BP_DIRECT	GO:0071407~cellular response to organic cyclic compound	2	6.45161	0.0653142	CDK1, TNF	30	45	19357	28.677	1	0.529045	0.506185
GOTERM_BP_DIRECT	GO:0014823~response to activity	2	6.45161	0.0681193	CDK1, TNF	30	47	19357	27.4567	1	0.540948	0.517573
GOTERM_BP_DIRECT	GO:0048015~phosphatidylinositol-mediated signaling	2	6.45161	0.0681193	PIK3CG, IGF1R	30	47	19357	27.4567	1	0.540948	0.517573
GOTERM_BP_DIRECT	GO:0006281~DNA repair	3	9.67742	0.0709457	PARP1, APEX1, CDK1	30	293	19357	6.60648	1	0.557922	0.533815
GOTERM_BP_DIRECT	GO:0043280~positive regulation of cysteine-type endopeptidase activity involved in apoptotic process	2	6.45161	0.0737052	SYK, TNF	30	51	19357	25.3033	1	0.568583	0.544015
GOTERM_BP_DIRECT	GO:0043491~protein kinase B signaling	2	6.45161	0.0737052	KDR, TNF	30	51	19357	25.3033	1	0.568583	0.544015
GOTERM_BP_DIRECT	GO:0045786~negative regulation of cell cycle	2	6.45161	0.0778734	CDK6, PTGS2	30	54	19357	23.8975	1	0.59507	0.569357
GOTERM_BP_DIRECT	GO:0042572~retinol metabolic process	2	6.45161	0.0792588	TTR, AKR1B1	30	55	19357	23.463	1	0.599996	0.57407
GOTERM_BP_DIRECT	GO:0051384~response to glucocorticoid	2	6.45161	0.0820235	PTGS2, TNF	30	57	19357	22.6398	1	0.609532	0.583194
GOTERM_BP_DIRECT	GO:0071320~cellular response to cAMP	2	6.45161	0.0820235	APEX1, PIK3CG	30	57	19357	22.6398	1	0.609532	0.583194
GOTERM_BP_DIRECT	GO:0034644~cellular response to UV	2	6.45161	0.0834028	PARP1, PTGS2	30	58	19357	22.2494	1	0.614148	0.587611
GOTERM_BP_DIRECT	GO:0000723~telomere maintenance	2	6.45161	0.0847801	PARP1, APEX1	30	59	19357	21.8723	1	0.618666	0.591933
GOTERM_BP_DIRECT	GO:0045668~negative regulation of osteoblast differentiation	2	6.45161	0.0889002	CDK6, TNF	30	62	19357	20.814	1	0.642939	0.615158
GOTERM_BP_DIRECT	GO:0032731~positive regulation of interleukin-1 beta production	2	6.45161	0.0916369	LGALS9, TNF	30	64	19357	20.1635	1	0.651105	0.62297
GOTERM_BP_DIRECT	GO:0070301~cellular response to hydrogen peroxide	2	6.45161	0.0916369	APEX1, CDK1	30	64	19357	20.1635	1	0.651105	0.62297
GOTERM_BP_DIRECT	GO:0000082~G1/S transition of mitotic cell cycle	2	6.45161	0.0943657	CDK6, CDK4	30	66	19357	19.5525	1	0.660842	0.632287
GOTERM_BP_DIRECT	GO:0010595~positive regulation of endothelial cell migration	2	6.45161	0.0957272	KDR, PIK3CG	30	67	19357	19.2607	1	0.660842	0.632287
GOTERM_BP_DIRECT	GO:0043154~negative regulation of cysteine-type endopeptidase activity involved in apoptotic process	2	6.45161	0.0957272	PTGS2, TNF	30	67	19357	19.2607	1	0.660842	0.632287
GOTERM_BP_DIRECT	GO:0030168~platelet activation	2	6.45161	0.0970866	SYK, ADRA2A	30	68	19357	18.9775	1	0.660842	0.632287
GOTERM_BP_DIRECT	GO:1901224~positive regulation of NIK/NF-kappaB signaling	2	6.45161	0.0970866	LGALS9, TNF	30	68	19357	18.9775	1	0.660842	0.632287
GOTERM_BP_DIRECT	GO:0021766~hippocampus development	2	6.45161	0.0984441	ALK, IGF1R	30	69	19357	18.7024	1	0.664498	0.635785

## Sheet: CC
Table S4. Gene Ontology (GO) enrichment analysis (BP)
Category	Term	Count	%	PValue	Genes	List Total	Pop Hits	Pop Total	Fold Enrichment	Bonferroni	Benjamini	FDR
GOTERM_CC_DIRECT	GO:0070062~extracellular exosome	12	38.7097	0.000172948	SLC22A12, ALK, ABCC1, TTR, PNP, CDK1, AKR1B1, CD38, PLAT, PYGL, SHBG, MPO	31	2219	20587	3.59133	0.019355	0.0195431	0.0179866
GOTERM_CC_DIRECT	GO:0032991~macromolecular complex	7	22.5806	0.000391995	ALK, TTR, SYK, PARP1, PTGS2, ESR1, TNF	31	683	20587	6.80626	0.043337	0.0221477	0.0203837
GOTERM_CC_DIRECT	GO:0000307~cyclin-dependent protein kinase holoenzyme complex	3	9.67742	0.00178613	CDK6, CDK4, CDK1	31	43	20587	46.3323	0.182916	0.0672776	0.0619192
GOTERM_CC_DIRECT	GO:0031526~brush border membrane	3	9.67742	0.00333576	SLC22A12, SLC28A2, ABCG2	31	59	20587	33.7676	0.314476	0.0852647	0.0784737
GOTERM_CC_DIRECT	GO:0043235~receptor complex	4	12.9032	0.00390052	ALK, KDR, ADRA2A, IGF1R	31	219	20587	12.1296	0.357007	0.0852647	0.0784737
GOTERM_CC_DIRECT	GO:0005667~transcription factor complex	4	12.9032	0.00452733	PARP1, CDK4, APEX1, ESR1	31	231	20587	11.4995	0.401153	0.0852647	0.0784737
GOTERM_CC_DIRECT	GO:0005737~cytoplasm	16	51.6129	0.00692222	SYK, PARP1, MMP3, PLAT, PYGL, PTGS2, ESR1, PIK3CG, ADRA2A, IGF1R, PNP, CDK6, CDK4, APEX1, CDK1, LGALS9	31	5634	20587	1.88597	0.543848	0.111744	0.102844
GOTERM_CC_DIRECT	GO:0005576~extracellular region	9	29.0323	0.00917574	TTR, PNP, MMP3, KDR, PLAT, PYGL, SHBG, MPO, TNF	31	2119	20587	2.82061	0.647126	0.129607	0.119285
GOTERM_CC_DIRECT	GO:0005887~integral component of plasma membrane	7	22.5806	0.0159995	ALK, ABCC1, KDR, SLC28A2, TNF, ADRA2A, IGF1R	31	1438	20587	3.23274	0.838389	0.200883	0.184883
GOTERM_CC_DIRECT	GO:0005615~extracellular space	8	25.8065	0.0194627	TTR, MMP3, AKR1B1, PLAT, LGALS9, MPO, TNF, XDH	31	1946	20587	2.7301	0.891496	0.219928	0.202412
GOTERM_CC_DIRECT	GO:0000781~chromosome, telomeric region	3	9.67742	0.0261805	PARP1, APEX1, CDK1	31	173	20587	11.5161	0.950104	0.268945	0.247525
GOTERM_CC_DIRECT	GO:0005886~plasma membrane	14	45.1613	0.0286112	ALK, ABCC1, SYK, ADK, ESR1, TNF, PIK3CG, ADRA2A, IGF1R, SLC22A12, KDR, CD38, SLC28A2, ABCG2	31	5334	20587	1.74304	0.96238	0.269422	0.247964
GOTERM_CC_DIRECT	GO:0005634~nucleus	15	48.3871	0.0311159	SYK, PARP1, MMP3, ADK, MPO, ESR1, IGF1R, PNP, CDK6, CDK4, APEX1, KDR, CDK1, CD38, LGALS9	31	5991	20587	1.66274	0.971899	0.270469	0.248927
GOTERM_CC_DIRECT	GO:0005829~cytosol	14	45.1613	0.0373785	SYK, PARP1, MAOA, ADK, AKR1B1, PYGL, ESR1, PIK3CG, PNP, CDK6, CDK4, CDK1, LGALS9, XDH	31	5521	20587	1.684	0.986496	0.301698	0.277669
GOTERM_CC_DIRECT	GO:0045121~membrane raft	3	9.67742	0.0478942	KDR, TNF, ABCG2	31	241	20587	8.26676	0.996097	0.348357	0.320612
GOTERM_CC_DIRECT	GO:0016323~basolateral plasma membrane	3	9.67742	0.0493248	ABCC1, CD38, ADRA2A	31	245	20587	8.1318	0.996707	0.348357	0.320612
GOTERM_CC_DIRECT	GO:0016592~mediator complex	2	6.45161	0.0608412	CDK6, CDK4	31	43	20587	30.8882	0.999169	0.404415	0.372205
GOTERM_CC_DIRECT	GO:0016020~membrane	10	32.2581	0.0797428	SLC22A12, ABCC1, PARP1, CDK1, CD38, SLC28A2, ESR1, TNF, PIK3CG, IGF1R	31	3739	20587	1.77613	0.999916	0.500607	0.460736
GOTERM_CC_DIRECT	GO:0043025~neuronal cell body	3	9.67742	0.0994941	TNF, ADRA2A, IGF1R	31	367	20587	5.42858	0.999993	0.548251	0.504585

## Sheet: MF
Table S4. Gene Ontology (GO) enrichment analysis (MF)
Category	Term	Count	%	PValue	Genes	List Total	Pop Hits	Pop Total	Fold Enrichment	Bonferroni	Benjamini	FDR
GOTERM_MF_DIRECT	GO:0004712~protein serine/threonine/tyrosine kinase activity	8	25.8065	4.50473e-06	ALK, CDK6, SYK, CDK4, CDK1, KDR, PIK3CG, IGF1R	31	440	18913	11.0927	0.000972551	0.000973022	0.000941489
GOTERM_MF_DIRECT	GO:0005524~ATP binding	12	38.7097	1.2774e-05	ALK, ABCC1, CDK6, SYK, CDK4, ADK, CDK1, KDR, PYGL, PIK3CG, ABCG2, IGF1R	31	1539	18913	4.75709	0.00275541	0.0013796	0.00133489
GOTERM_MF_DIRECT	GO:0042802~identical protein binding	12	38.7097	3.23084e-05	ALK, TTR, PNP, PARP1, KDR, CD38, PYGL, ESR1, TNF, PIK3CG, ABCG2, IGF1R	31	1698	18913	4.31164	0.00695444	0.00232621	0.00225082
GOTERM_MF_DIRECT	GO:0008353~RNA polymerase II carboxy-terminal domain kinase activity	3	9.67742	0.000187672	CDK6, CDK4, CDK1	31	13	18913	140.792	0.0397302	0.0101343	0.00980588
GOTERM_MF_DIRECT	GO:0004713~protein tyrosine kinase activity	4	12.9032	0.000730483	ALK, SYK, KDR, IGF1R	31	112	18913	21.7892	0.146015	0.0315569	0.0305342
GOTERM_MF_DIRECT	GO:0004693~cyclin-dependent protein serine/threonine kinase activity	3	9.67742	0.00102924	CDK6, CDK4, CDK1	31	30	18913	61.0097	0.199429	0.0370525	0.0358517
GOTERM_MF_DIRECT	GO:0030332~cyclin binding	3	9.67742	0.00140089	CDK6, CDK4, CDK1	31	35	18913	52.294	0.261256	0.0432274	0.0418266
GOTERM_MF_DIRECT	GO:0002060~purine nucleobase binding	2	6.45161	0.00316999	PNP, PYGL	31	2	18913	610.097	0.496315	0.0764988	0.0740196
GOTERM_MF_DIRECT	GO:0004714~transmembrane receptor protein tyrosine kinase activity	3	9.67742	0.00318745	ALK, KDR, IGF1R	31	53	18913	34.5338	0.498218	0.0764988	0.0740196
GOTERM_MF_DIRECT	GO:0015143~urate transmembrane transporter activity	2	6.45161	0.00948085	SLC22A12, ABCG2	31	6	18913	203.366	0.872244	0.204786	0.19815
GOTERM_MF_DIRECT	GO:0004672~protein kinase activity	4	12.9032	0.021573	SYK, CDK4, CDK1, PIK3CG	31	378	18913	6.45605	0.991002	0.339227	0.328233
GOTERM_MF_DIRECT	GO:0019899~enzyme binding	4	12.9032	0.0218719	PARP1, LGALS9, PTGS2, ESR1	31	380	18913	6.42207	0.991577	0.339227	0.328233
GOTERM_MF_DIRECT	GO:0008559~xenobiotic-transporting ATPase activity	2	6.45161	0.0219869	ABCC1, ABCG2	31	14	18913	87.1567	0.991788	0.339227	0.328233
GOTERM_MF_DIRECT	GO:0015562~efflux transmembrane transporter activity	2	6.45161	0.0219869	ABCC1, ABCG2	31	14	18913	87.1567	0.991788	0.339227	0.328233
GOTERM_MF_DIRECT	GO:0004674~protein serine/threonine kinase activity	4	12.9032	0.0245048	SYK, CDK4, CDK1, PIK3CG	31	397	18913	6.14707	0.995294	0.352868	0.341433
GOTERM_MF_DIRECT	GO:0042803~protein homodimerization activity	5	16.129	0.026952	PARP1, PTGS2, XDH, ADRA2A, ABCG2	31	728	18913	4.19023	0.997265	0.363852	0.352061
GOTERM_MF_DIRECT	GO:0042910~xenobiotic transporter activity	2	6.45161	0.0312662	ABCC1, ABCG2	31	20	18913	61.0097	0.998952	0.397264	0.38439
GOTERM_MF_DIRECT	GO:0005496~steroid binding	2	6.45161	0.0465427	SHBG, ESR1	31	30	18913	40.6731	0.999966	0.498892	0.482724
GOTERM_MF_DIRECT	GO:0019901~protein kinase binding	4	12.9032	0.0475463	SYK, PARP1, ESR1, ADRA2A	31	516	18913	4.72943	0.999973	0.498892	0.482724
GOTERM_MF_DIRECT	GO:0016301~kinase activity	3	9.67742	0.048115	ALK, CDK4, PIK3CG	31	222	18913	8.24455	0.999976	0.498892	0.482724
GOTERM_MF_DIRECT	GO:0016491~oxidoreductase activity	3	9.67742	0.0485034	MAOA, APEX1, XDH	31	223	18913	8.20758	0.999978	0.498892	0.482724
GOTERM_MF_DIRECT	GO:0004601~peroxidase activity	2	6.45161	0.0570975	PTGS2, MPO	31	37	18913	32.9782	0.999997	0.560594	0.542426
GOTERM_MF_DIRECT	GO:0030331~estrogen receptor binding	2	6.45161	0.0645674	PARP1, ESR1	31	42	18913	29.0522	0.999999	0.606372	0.586721
GOTERM_MF_DIRECT	GO:0042626~ATPase activity, coupled to transmembrane movement of substances	2	6.45161	0.0705021	ABCC1, ABCG2	31	46	18913	26.5259	1	0.634519	0.613956
GOTERM_MF_DIRECT	GO:0005515~protein binding	25	80.6452	0.0849968	ALK, MAOA, AKR1B1, PLAT, PYGL, PTGS2, MPO, TNF, PIK3CG, IGF1R, TTR, PNP, KDR, XDH, SYK, PARP1, MMP3, ESR1, ADRA2A, CDK6, CDK4, APEX1, CDK1, SHBG, ABCG2	31	12623	18913	1.2083	1	0.734372	0.710573
