# Supplementary material
Source: Royal Society of Chemistry journal article supplement (doi:10.1039/d5fo05398f)
Supplement: d5fo05398f6.xlsx [file d5fo05398f6.xlsx]

## Sheet: Sheet1
Table S5. Encyclopedia of Genes and Genomes (KEGG) pathway analysis
Category	Term	Count	%	PValue	Genes	List Total	Pop Hits	Pop Total	Fold Enrichment	Bonferroni	Benjamini	FDR
KEGG_PATHWAY	hsa05167:Kaposi sarcoma-associated herpesvirus infection	5	16.129	0.00301256	CDK6, SYK, CDK4, PTGS2, PIK3CG	27	194	8205	7.83219	0.40485	0.194269	0.19201
KEGG_PATHWAY	hsa01523:Antifolate resistance	3	9.67742	0.00397746	ABCC1, TNF, ABCG2	27	30	8205	30.3889	0.496156	0.194269	0.19201
KEGG_PATHWAY	hsa04064:NF-kappa B signaling pathway	4	12.9032	0.00416136	SYK, PARP1, PTGS2, TNF	27	104	8205	11.688	0.511906	0.194269	0.19201
KEGG_PATHWAY	hsa04151:PI3K-Akt signaling pathway	6	19.3548	0.00451788	CDK6, SYK, CDK4, KDR, PIK3CG, IGF1R	27	354	8205	5.15066	0.54106	0.194269	0.19201
KEGG_PATHWAY	hsa05224:Breast cancer	4	12.9032	0.0108324	CDK6, CDK4, ESR1, IGF1R	27	147	8205	8.26909	0.846391	0.321681	0.31794
KEGG_PATHWAY	hsa05223:Non-small cell lung cancer	3	9.67742	0.0215446	ALK, CDK6, CDK4	27	72	8205	12.662	0.976392	0.321681	0.31794
KEGG_PATHWAY	hsa05218:Melanoma	3	9.67742	0.0215446	CDK6, CDK4, IGF1R	27	72	8205	12.662	0.976392	0.321681	0.31794
KEGG_PATHWAY	hsa04115:p53 signaling pathway	3	9.67742	0.0221087	CDK6, CDK4, CDK1	27	73	8205	12.4886	0.978621	0.321681	0.31794
KEGG_PATHWAY	hsa05202:Transcriptional misregulation in cancer	4	12.9032	0.0223816	MMP3, PLAT, MPO, IGF1R	27	193	8205	6.29822	0.979623	0.321681	0.31794
KEGG_PATHWAY	hsa05214:Glioma	3	9.67742	0.0232555	CDK6, CDK4, IGF1R	27	75	8205	12.1556	0.982528	0.321681	0.31794
KEGG_PATHWAY	hsa05200:Pathways in cancer	6	19.3548	0.0235981	ALK, CDK6, CDK4, PTGS2, ESR1, IGF1R	27	531	8205	3.43377	0.983552	0.321681	0.31794
KEGG_PATHWAY	hsa05169:Epstein-Barr virus infection	4	12.9032	0.025202	CDK6, SYK, CDK4, TNF	27	202	8205	6.0176	0.987603	0.321681	0.31794
KEGG_PATHWAY	hsa05203:Viral carcinogenesis	4	12.9032	0.0258539	CDK6, SYK, CDK4, CDK1	27	204	8205	5.95861	0.988951	0.321681	0.31794
KEGG_PATHWAY	hsa05205:Proteoglycans in cancer	4	12.9032	0.0261833	KDR, ESR1, TNF, IGF1R	27	205	8205	5.92954	0.989575	0.321681	0.31794
KEGG_PATHWAY	hsa01232:Nucleotide metabolism	3	9.67742	0.0293465	PNP, ADK, XDH	27	85	8205	10.7255	0.994043	0.32771	0.323899
KEGG_PATHWAY	hsa05163:Human cytomegalovirus infection	4	12.9032	0.0332513	CDK6, CDK4, PTGS2, TNF	27	225	8205	5.40247	0.997022	0.32771	0.323899
KEGG_PATHWAY	hsa05222:Small cell lung cancer	3	9.67742	0.0339495	CDK6, CDK4, PTGS2	27	92	8205	9.90942	0.99737	0.32771	0.323899
KEGG_PATHWAY	hsa04657:IL-17 signaling pathway	3	9.67742	0.0353138	MMP3, PTGS2, TNF	27	94	8205	9.69858	0.997937	0.32771	0.323899
KEGG_PATHWAY	hsa05215:Prostate cancer	3	9.67742	0.0373999	MMP3, PLAT, IGF1R	27	97	8205	9.39863	0.998579	0.32771	0.323899
KEGG_PATHWAY	hsa01522:Endocrine resistance	3	9.67742	0.0381058	CDK4, ESR1, IGF1R	27	98	8205	9.30272	0.998747	0.32771	0.323899
KEGG_PATHWAY	hsa04625:C-type lectin receptor signaling pathway	3	9.67742	0.042448	SYK, PTGS2, TNF	27	104	8205	8.76603	0.999425	0.347669	0.343627
KEGG_PATHWAY	hsa04668:TNF signaling pathway	3	9.67742	0.0485133	MMP3, PTGS2, TNF	27	112	8205	8.13988	0.999807	0.379286	0.374876
KEGG_PATHWAY	hsa04110:Cell cycle	3	9.67742	0.0606763	CDK6, CDK4, CDK1	27	127	8205	7.17848	0.999979	0.440905	0.435779
KEGG_PATHWAY	hsa00230:Purine metabolism	3	9.67742	0.0615217	PNP, ADK, XDH	27	128	8205	7.1224	0.999982	0.440905	0.435779
KEGG_PATHWAY	hsa05418:Fluid shear stress and atherosclerosis	3	9.67742	0.0710858	KDR, PLAT, TNF	27	139	8205	6.55875	0.999997	0.489071	0.483384
KEGG_PATHWAY	hsa04921:Oxytocin signaling pathway	3	9.67742	0.0848569	CD38, PTGS2, PIK3CG	27	154	8205	5.91991	1	0.512793	0.50683
KEGG_PATHWAY	hsa05165:Human papillomavirus infection	4	12.9032	0.0853662	CDK6, CDK4, PTGS2, TNF	27	331	8205	3.67237	1	0.512793	0.50683
KEGG_PATHWAY	hsa04218:Cellular senescence	3	9.67742	0.0867518	CDK6, CDK4, CDK1	27	156	8205	5.84402	1	0.512793	0.50683
KEGG_PATHWAY	hsa05160:Hepatitis C	3	9.67742	0.0877042	CDK6, CDK4, TNF	27	157	8205	5.80679	1	0.512793	0.50683
KEGG_PATHWAY	hsa04217:Necroptosis	3	9.67742	0.0896187	PARP1, PYGL, TNF	27	159	8205	5.73375	1	0.512793	0.50683
KEGG_PATHWAY	hsa05225:Hepatocellular carcinoma	3	9.67742	0.0983888	CDK6, CDK4, IGF1R	27	168	8205	5.42659	1	0.512793	0.50683
KEGG_PATHWAY	hsa01100:Metabolic pathways	9	29.0323	0.0985305	PNP, MAOA, ADK, AKR1B1, CD38, PYGL, PTGS2, XDH, PIK3CG	27	1541	8205	1.77482	1	0.512793	0.50683
KEGG_PATHWAY	hsa03410:Base excision repair	2	6.45161	0.0996228	PARP1, APEX1	27	33	8205	18.4175	1	0.512793	0.50683
